# Supplementary material for: Expression and Trans-Specific Polymorphism of Self-Incompatibility RNases in Coffea (Rubiaceae)
Source: PubMed Central journal article supplement (PMC3120821; doi:10.1371/journal.pone.0021019), 2011-06-22
Supplement: pone.0021019.s002.pdf [file pone.0021019.s002.pdf]

**Supporting Information Table S1. Primer sequences for amplification of *Coffea* RNase T2 genes.**

| <b>Primer Name</b> | <b>Sequence (5' - 3')</b>     | <b>Notes</b>                          |
|--------------------|-------------------------------|---------------------------------------|
| Sc2Tot01.F         | TTYASIRTYCAYGGIYTRTGGCC       | S-RNase Forward primer used in 3'RACE |
| Sc2Tot03-20bp.F    | ASIRTYCAYGGIYTNTGGCC          | S-RNase Forward primer used in 3'RACE |
| CoffBA11-3.F       | AAYTRTSGYRGYRSCVSWTAYVKRCC    | S-RNase Forward primer used in 3'RACE |
| CoffBA11-1.R       | GYGGAVRWRGVWBDARYABAATCTA     | S-RNase Reverse primer used in 3'RACE |
| Coffc2A-1.F        | CAAACCACACTGGYAYAGTGGAAWATTGC | RNase "A" gene specific Forward       |
| CoffendA-1.R       | ATACAATCTTGCCGTTTCCTAGYCCTCG  | RNase "A" gene specific Reverse       |
| Coffc2C-2.F        | CGGGCAAYYTCRCCVAAATTTTGC      | RNase "C" gene specific Forward       |
| CoffendC-1.R       | CWCCCAGTTCGYAGAAATTGTGAAGGAC  | RNase "C" gene specific Reverse       |
