# Supplementary material for: Expression and Trans-Specific Polymorphism of Self-Incompatibility RNases in Coffea (Rubiaceae)
Source: PubMed Central journal article supplement (PMC3120821; doi:10.1371/journal.pone.0021019), 2011-06-22
Supplement: pone.0021019.s003.pdf [file pone.0021019.s003.pdf]

**Supporting Information Table S2: Plant RNase T2 sequences employed in phylogenetic analysis shown in Figure 3.**

| <b>Sequence ID</b> | <b>Species</b>                 | <b>Family</b>  | <b>Accession number</b> | <b>Source Publication</b> |
|--------------------|--------------------------------|----------------|-------------------------|---------------------------|
| Ant.hispanicumS3   | <i>Antirrhinum hispanicum</i>  | Plantaginaceae | AJ315593.1              | Vieira et al. (2008)      |
| Ant.mollissSI28    | <i>Antirrhinum mollissimum</i> | Plantaginaceae | AJ315591.1              | Vieira et al. (2008)      |
| Ant.mollissSI29    | <i>Antirrhinum mollissimum</i> | Plantaginaceae | AJ315592.1              | Vieira et al. (2008)      |
| MisopatesSC        | <i>Misopates orontium</i>      | Plantaginaceae | AY013906.1              | Vieira et al. (2008)      |
| Ant.hispanicumS5   | <i>Antirrhinum hispanicum</i>  | Plantaginaceae | X96464.1                | Igic and Kohn (2001)      |
| Ant.hispanicumS2   | <i>Antirrhinum hispanicum</i>  | Plantaginaceae | AJ300474                | Igic and Kohn (2001)      |
| Ant.hispanicumS4   | <i>Antirrhinum hispanicum</i>  | Plantaginaceae | X96466.1                | Igic and Kohn (2001)      |
| Pru.aviumS1        | <i>Prunus avium</i>            | Rosaceae       | AB028153.1              | Igic and Kohn (2001)      |
| Pru.aviumS2        | <i>Prunus avium</i>            | Rosaceae       | AB010304.1              | Igic and Kohn (2001)      |
| Pru.aviumS3        | <i>Prunus avium</i>            | Rosaceae       | AB010306.1              | Igic and Kohn (2001)      |
| Pru.aviumS4        | <i>Prunus avium</i>            | Rosaceae       | AB028154.1              | Igic and Kohn (2001)      |
| Pru.aviumS6        | <i>Prunus avium</i>            | Rosaceae       | AB010305.1              | Igic and Kohn (2001)      |
| Pru.dulcisPD1      | <i>Prunus dulcis</i>           | Rosaceae       | AF227522                | Igic and Kohn (2001)      |
| Pru.dulcisPD2      | <i>Prunus dulcis</i>           | Rosaceae       | AF202030                | Igic and Kohn (2001)      |
| Pru.dulcisSb       | <i>Prunus dulcis</i>           | Rosaceae       | AF148466.1              | Igic and Kohn (2001)      |
| Pru.dulcisSe       | <i>Prunus dulcis</i>           | Rosaceae       | AF177923.1              | Vieira et al. (2008)      |
| Pru.salicinaSb     | <i>Prunus saliciana</i>        | Rosaceae       | AB026982                | Igic and Kohn (2001)      |
| Pru.saliciSa       | <i>Prunus saliciana</i>        | Rosaceae       | AB026981                | Igic and Kohn (2001)      |
| Pyr.pyrifoliaRNase | <i>Pyrus pyrifolia</i>         | Rosaceae       | D49529                  | Igic and Kohn (2001)      |
| Pyr.pyrifoliaS1    | <i>Pyrus pyrifolia</i>         | Rosaceae       | AB002139.1              | Igic and Kohn (2001)      |
| Pyr.pyrifoliaS3    | <i>Pyrus pyrifolia</i>         | Rosaceae       | AB025421.1              | Igic and Kohn (2001)      |
| Pyr.pyrifoliaS4    | <i>Pyrus pyrifolia</i>         | Rosaceae       | AB014072.1              | Igic and Kohn (2001)      |
| Pyr.pyrifoliaS5    | <i>Pyrus pyrifolia</i>         | Rosaceae       | AB002141.1              | Igic and Kohn (2001)      |
| Pyr.pyrifoliaS6    | <i>Pyrus pyrifolia</i>         | Rosaceae       | AB002142.1              | Igic and Kohn (2001)      |
| Sol.chacoenseS11   | <i>Solanum chacoense</i>       | Solanaceae     | S69589                  | Igic and Kohn (2001)      |
| Sol.chacoenseS12   | <i>Solanum chacoense</i>       | Solanaceae     | AF176533.1              | Igic and Kohn (2001)      |
| Sol.chacoenseS14   | <i>Solanum chacoense</i>       | Solanaceae     | AF232304.1              | Igic and Kohn (2001)      |
| Tri.aestivum       | <i>Triticum aestivum</i>       | Poaceae        | BF474879                | Igic and Kohn (2001)      |
| Vol.carteri        | <i>Volvox carteri</i>          | Volvocaceae    | BAA95359.1              | Igic and Kohn (2001)      |

|                    |                                |                |            |                      |
|--------------------|--------------------------------|----------------|------------|----------------------|
| Zea.mays           | <i>Zea mays</i>                | Poaceae        | AY107592.1 | Vieira et al. (2008) |
| Zea.maysKIN        | <i>Zea mays</i>                | Poaceae        | U66241     | Igic and Kohn (2001) |
| Zin.elegans1       | <i>Zinnia elegans</i>          | Asteraceae     | U19923     | Igic and Kohn (2001) |
| Zin.elegans2       | <i>Zinnia elegans</i>          | Asteraceae     | U19924     | Igic and Kohn (2001) |
| Ara.thalianaRNS1   | <i>Arabidopsis thaliana</i>    | Brassicaceae   | AC004138   | Igic and Kohn (2001) |
| Ara.thalianaRNS2   | <i>Arabidopsis thaliana</i>    | Brassicaceae   | AC003000   | Igic and Kohn (2001) |
| Ara.thalianaRNS3   | <i>Arabidopsis thaliana</i>    | Brassicaceae   | AC006535   | Igic and Kohn (2001) |
| Ara.thalianaRNS4   | <i>Arabidopsis thaliana</i>    | Brassicaceae   | AC007576   | Igic and Kohn (2001) |
| Ara.thalianaRNS5   | <i>Arabidopsis thaliana</i>    | Brassicaceae   | AC007576   | Igic and Kohn (2001) |
| Cal.sepium         | <i>Calystegia sepium</i>       | Convolvulaceae | AF139660   | Igic and Kohn (2001) |
| Cic.arietinum      | <i>Cicer arietinum</i>         | Fabaceae       | AJ012689   | Igic and Kohn (2001) |
| Gly.max            | <i>Glycine max</i>             | Fabaceae       | BG155668   | Igic and Kohn (2001) |
| Gos.hirsutum       | <i>Gossypium hirsutum</i>      | Malvaceae      | AI729649   | Igic and Kohn (2001) |
| HetermEST          | <i>Hedyotis terminalis</i>     | Rubiaceae      | CB078110.1 | Vieira et al. (2008) |
| Hor.vulgare2       | <i>Hordeum vulgare</i>         | Poaceae        | AF000940   | Igic and Kohn (2001) |
| Hor.vulgare4       | <i>Hordeum vulgare</i>         | Poaceae        | AL506966   | Igic and Kohn (2001) |
| Hor.vulgarersh1    | <i>Hordeum vulgare</i>         | Poaceae        | AF182197   | Igic and Kohn (2001) |
| Hor.vulgareX       | <i>Hordeum vulgare</i>         | Poaceae        | BF623030   | Igic and Kohn (2001) |
| Hor.vulgareZ       | <i>Hordeum vulgare</i>         | Poaceae        | BE060118   | Igic and Kohn (2001) |
| Luf.cylindricaLC1  | <i>Luffa cylindrica</i>        | Cucurbitaceae  | D64012     | Igic and Kohn (2001) |
| Luf.cylindricaLC2  | <i>Luffa cylindrica</i>        | Cucurbitaceae  | D64011     | Igic and Kohn (2001) |
| Lyc.esculentumLE   | <i>Lycopersicon esculentum</i> | Solanaceae     | X79337     | Igic and Kohn (2001) |
| Lyc.esculentumLX   | <i>Lycopersicon esculentum</i> | Solanaceae     | AW039494   | Igic and Kohn (2001) |
| Lyc.esculentumRNS2 | <i>Lycopersicon esculentum</i> | Solanaceae     | AK324819.1 | Igic and Kohn (2001) |
| Lyc.peruvianumS11  | <i>Lycium peruvianum</i>       | Solanaceae     | U28795.1   | Igic and Kohn (2001) |
| Lyc.peruvianumS12  | <i>Lycium peruvianum</i>       | Solanaceae     | U28796.1   | Igic and Kohn (2001) |
| Lyc.peruvianumS3   | <i>Lycium peruvianum</i>       | Solanaceae     | X76065.1   | Igic and Kohn (2001) |
| Mal.domesticaSd    | <i>Malus domestica</i>         | Rosaceae       | AB032246   | Igic and Kohn (2001) |
| Mal.domesticaSe    | <i>Malus domestica</i>         | Rosaceae       | AB035273.1 | Igic and Kohn (2001) |
| Med.truncatula2    | <i>Medicago truncatula</i>     | Fabaceae       | BF645898   | Igic and Kohn (2001) |
| Med.truncatula4    | <i>Medicago truncatula</i>     | Fabaceae       | BG455183   | Igic and Kohn (2001) |

|                   |                               |                  |               |                         |
|-------------------|-------------------------------|------------------|---------------|-------------------------|
| Med.truncatula5   | <i>Medicago truncatula</i>    | Fabaceae         | BG451455      | Igic and Kohn (2001)    |
| N.alataSA2        | <i>Nicotiana alata</i>        | Solanaceae       | U08860.1      | Igic and Kohn (2001)    |
| Nel.nucifera      | <i>Nelumbo nucifera</i>       | Nelumbonaceae    | M83668.1      | Igic and Kohn (2001)    |
| Nic.alataNE       | <i>Nicotiana alata</i>        | Solanaceae       | U13256.1      | Igic and Kohn (2001)    |
| Nic.alataS2       | <i>Nicotiana alata</i>        | Solanaceae       | U08860.1      | Igic and Kohn (2001)    |
| Nic.glutinosaNGR2 | <i>Nicotiana glutinosa</i>    | Solanaceae       | AB032256      | Igic and Kohn (2001)    |
| Nic.glutinosaNGR3 | <i>Nicotiana glutinosa</i>    | Solanaceae       | AB032257      | Igic and Kohn (2001)    |
| Nic.tabacumNK1    | <i>Nicotiana tabacum</i>      | Solanaceae       | AB034638      | Igic and Kohn (2001)    |
| Ory.sativa1       | <i>Oryza sativa</i>           | Poaceae          | AB052842      | Igic and Kohn (2001)    |
| Ory.sativa2       | <i>Oryza sativa</i>           | Poaceae          | AU091979      | Igic and Kohn (2001)    |
| Pin.taeda         | <i>Pinus taeda</i>            | Pinaceae         | BF186081      | Igic and Kohn (2001)    |
| Pis.sativumHGRP   | <i>Pisum sativum</i>          | Fabaceae         | Y11824.1      | Igic and Kohn (2001)    |
| GmaRNS12          | <i>Glycine max</i>            | Fabaceae         | Glyma03g35230 | MacIntosh et al. (2010) |
| GmaRNS5           | <i>Glycine max</i>            | Fabaceae         | Glyma02g07130 | MacIntosh et al. (2010) |
| GmaRNS4           | <i>Glycine max</i>            | Fabaceae         | Glyma02g07140 | MacIntosh et al. (2010) |
| GmaRNS3           | <i>Glycine max</i>            | Fabaceae         | Glyma02g07150 | MacIntosh et al. (2010) |
| GmaRNS6           | <i>Glycine max</i>            | Fabaceae         | Glyma07g06520 | MacIntosh et al. (2010) |
| GmaRNS2           | <i>Glycine max</i>            | Fabaceae         | Glyma16g03120 | MacIntosh et al. (2010) |
| RnaseLER          | <i>Solanum lycopersicum</i>   | Solanaceae       | CAL64053      | MacIntosh et al. (2010) |
| CAC50874          | <i>Antirrhinum hispanicum</i> | Plantaginaceae   | CAC50874      | MacIntosh et al. (2010) |
| PtrRNS2           | <i>Populus trichocarpa</i>    | Betulaceae       | XP_002321228  | MacIntosh et al. (2010) |
| Miguf021969m      | <i>Mimulus guttatus</i>       | Scrophulariaceae | mgf021969m    | Phytozome v.5.0         |
| PtrRNS5           | <i>Populus trichocarpa</i>    | Betulaceae       | EEE95823      | MacIntosh et al. (2010) |
