# Supplementary material for: Expression and Trans-Specific Polymorphism of Self-Incompatibility RNases in Coffea (Rubiaceae)
Source: PubMed Central journal article supplement (PMC3120821; doi:10.1371/journal.pone.0021019), 2011-06-22
Supplement: pone.0021019.s005.pdf [file pone.0021019.s005.pdf]

**Table S4. Pairwise dN/dS Estimates.**

**Summary Statistics:**

| Mean dN/dS  | StDev dN/dS | Min dN/dS | Max dN/dS |
|-------------|-------------|-----------|-----------|
| 0.361727937 | 0.096725808 | 0.1531    | 0.8719    |

| seq | seq | N     | S     | dN     | dS     | dN/dS  | Paras. |        |        |          |  |
|-----|-----|-------|-------|--------|--------|--------|--------|--------|--------|----------|--|
| 2   | 1   | 313   | 107   | 0.2135 | 0.5073 | 0.4209 | 0.8652 | 2.6745 | 0.4209 | -864.922 |  |
| 3   | 1   | 306.3 | 113.7 | 0.1858 | 0.4968 | 0.3739 | 0.8099 | 3.2165 | 0.3739 | -848.715 |  |
| 3   | 2   | 312.4 | 107.6 | 0.1861 | 0.3811 | 0.4884 | 0.7082 | 2.5902 | 0.4884 | -840.923 |  |
| 4   | 1   | 304.7 | 115.3 | 0.1918 | 0.4721 | 0.4062 | 0.8061 | 2.985  | 0.4062 | -855.951 |  |
| 4   | 2   | 308.8 | 111.2 | 0.206  | 0.508  | 0.4055 | 0.8579 | 2.4823 | 0.4055 | -873.912 |  |
| 4   | 3   | 302.7 | 117.3 | 0.2254 | 0.4897 | 0.4604 | 0.8977 | 3.1917 | 0.4604 | -877.68  |  |
| 5   | 1   | 317   | 103   | 0.1515 | 0.742  | 0.2042 | 0.8888 | 1.999  | 0.2042 | -846.033 |  |
| 5   | 2   | 315.3 | 104.7 | 0.1907 | 0.4392 | 0.4341 | 0.7578 | 2.2201 | 0.4341 | -849.679 |  |
| 5   | 3   | 306.7 | 113.3 | 0.1885 | 0.5111 | 0.3687 | 0.8265 | 3.0439 | 0.3687 | -851.032 |  |
| 5   | 4   | 317.7 | 102.3 | 0.1803 | 0.58   | 0.3109 | 0.8331 | 1.5884 | 0.3109 | -868.661 |  |
| 6   | 1   | 307.1 | 112.9 | 0.1795 | 0.4427 | 0.4054 | 0.7507 | 2.9219 | 0.4054 | -843.482 |  |
| 6   | 2   | 309.5 | 110.5 | 0.1792 | 0.426  | 0.4206 | 0.7323 | 2.9082 | 0.4206 | -840.017 |  |
| 6   | 3   | 307.8 | 112.2 | 0.1881 | 0.5167 | 0.364  | 0.8276 | 2.8636 | 0.364  | -858.484 |  |
| 6   | 4   | 306   | 114   | 0.1647 | 0.6432 | 0.2561 | 0.8838 | 2.506  | 0.2561 | -858.944 |  |
| 6   | 5   | 315   | 105   | 0.1794 | 0.7643 | 0.2348 | 0.977  | 1.9902 | 0.2348 | -867.89  |  |
| 7   | 1   | 308.6 | 111.4 | 0.1967 | 0.5114 | 0.3846 | 0.8405 | 2.9474 | 0.3846 | -858.197 |  |
| 7   | 2   | 314.9 | 105.1 | 0.1417 | 0.4368 | 0.3244 | 0.6466 | 2.2851 | 0.3244 | -825.865 |  |
| 7   | 3   | 307.8 | 112.2 | 0.2017 | 0.4026 | 0.501  | 0.766  | 2.9272 | 0.501  | -853.844 |  |
| 7   | 4   | 310.8 | 109.2 | 0.1564 | 0.4737 | 0.3303 | 0.7168 | 2.069  | 0.3303 | -845.797 |  |
| 7   | 5   | 319.7 | 100.3 | 0.1478 | 0.5712 | 0.2587 | 0.7466 | 1.7066 | 0.2587 | -839.424 |  |
| 7   | 6   | 310.7 | 109.3 | 0.1317 | 0.5074 | 0.2595 | 0.6884 | 2.4078 | 0.2595 | -822.296 |  |
| 8   | 1   | 316.3 | 103.7 | 0.1567 | 0.652  | 0.2403 | 0.8368 | 1.9953 | 0.2403 | -850.624 |  |
| 8   | 2   | 315.3 | 104.7 | 0.204  | 0.4079 | 0.5001 | 0.7645 | 2.1505 | 0.5001 | -859.162 |  |
| 8   | 3   | 312.7 | 107.3 | 0.1992 | 0.5559 | 0.3583 | 0.871  | 2.2481 | 0.3583 | -870.648 |  |
| 8   | 4   | 311.7 | 108.3 | 0.1845 | 0.6544 | 0.282  | 0.9171 | 2.0167 | 0.282  | -875.54  |  |
| 8   | 5   | 321   | 99    | 0.1699 | 0.6556 | 0.2591 | 0.8531 | 1.6283 | 0.2591 | -857.173 |  |
| 8   | 6   | 313   | 107   | 0.1671 | 0.5367 | 0.3113 | 0.7835 | 2.1218 | 0.3113 | -849.043 |  |
| 8   | 7   | 309.4 | 110.6 | 0.1745 | 0.4078 | 0.4278 | 0.7078 | 2.6464 | 0.4278 | -841.565 |  |
| 9   | 1   | 310   | 110   | 0.1478 | 0.5998 | 0.2465 | 0.7987 | 2.6083 | 0.2465 | -833.509 |  |
| 9   | 2   | 308.6 | 111.4 | 0.1629 | 0.6078 | 0.268  | 0.8427 | 3.0055 | 0.268  | -843.331 |  |
| 9   | 3   | 304.5 | 115.5 | 0.1928 | 0.4769 | 0.4043 | 0.8128 | 3.4473 | 0.4043 | -848.477 |  |
| 9   | 4   | 306.8 | 113.2 | 0.1959 | 0.6719 | 0.2916 | 0.9727 | 2.5745 | 0.2916 | -879.263 |  |
| 9   | 5   | 309.3 | 110.7 | 0.145  | 0.7672 | 0.189  | 0.927  | 2.6723 | 0.189  | -837.075 |  |
| 9   | 6   | 307.3 | 112.7 | 0.1531 | 0.6103 | 0.2509 | 0.8275 | 2.9778 | 0.2509 | -835.816 |  |
| 9   | 7   | 302.2 | 117.8 | 0.1303 | 0.5959 | 0.2187 | 0.7829 | 3.8615 | 0.2187 | -816.81  |  |
| 9   | 8   | 310.7 | 109.3 | 0.1757 | 0.6309 | 0.2785 | 0.8823 | 2.4519 | 0.2785 | -854.12  |  |
| 10  | 1   | 316   | 104   | 0.1484 | 0.4694 | 0.3162 | 0.6836 | 2.1672 | 0.3162 | -825.98  |  |
| 10  | 2   | 317.2 | 102.8 | 0.1839 | 0.5339 | 0.3444 | 0.8088 | 2.2191 | 0.3444 | -856.189 |  |
| 10  | 3   | 312.4 | 107.6 | 0.164  | 0.4734 | 0.3464 | 0.7297 | 2.432  | 0.3464 | -839.369 |  |
| 10  | 4   | 310.5 | 109.5 | 0.191  | 0.5008 | 0.3815 | 0.8153 | 2.198  | 0.3815 | -867.02  |  |
| 10  | 5   | 316.5 | 103.5 | 0.1541 | 0.5786 | 0.2663 | 0.7759 | 2.0311 | 0.2663 | -841.349 |  |
| 10  | 6   | 309.1 | 110.9 | 0.1855 | 0.4551 | 0.4077 | 0.7701 | 2.7541 | 0.4077 | -847.587 |  |
| 10  | 7   | 313.1 | 106.9 | 0.1817 | 0.5149 | 0.3528 | 0.7995 | 2.3795 | 0.3528 | -857.295 |  |
| 10  | 8   | 321.4 | 98.6  | 0.1613 | 0.4766 | 0.3384 | 0.7059 | 1.5717 | 0.3384 | -844.067 |  |
| 10  | 9   | 312.5 | 107.5 | 0.1613 | 0.6104 | 0.2643 | 0.8288 | 2.354  | 0.2643 | -845.327 |  |
| 11  | 1   | 307.7 | 112.3 | 0.1779 | 0.5401 | 0.3293 | 0.8243 | 3.1684 | 0.3293 | -845.938 |  |
| 11  | 2   | 313.1 | 106.9 | 0.2177 | 0.5223 | 0.4168 | 0.8857 | 2.6768 | 0.4168 | -871.775 |  |
| 11  | 3   | 310.6 | 109.4 | 0.1991 | 0.4246 | 0.4689 | 0.7734 | 2.5429 | 0.4689 | -858.967 |  |
| 11  | 4   | 310.2 | 109.8 | 0.194  | 0.5657 | 0.3429 | 0.8734 | 2.0815 | 0.3429 | -875.393 |  |
| 11  | 5   | 310   | 110   | 0.196  | 0.5392 | 0.3635 | 0.8577 | 2.6342 | 0.3635 | -863.905 |  |
| 11  | 6   | 309.5 | 110.5 | 0.165  | 0.5767 | 0.2861 | 0.82   | 2.5659 | 0.2861 | -848.879 |  |
| 11  | 7   | 309.6 | 110.4 | 0.1914 | 0.5146 | 0.3718 | 0.8291 | 2.7508 | 0.3718 | -858.567 |  |
| 11  | 8   | 313.5 | 106.5 | 0.1876 | 0.4847 | 0.387  | 0.7887 | 2.1655 | 0.387  | -859.283 |  |
| 11  | 9   | 312.9 | 107.1 | 0.1922 | 0.5725 | 0.3358 | 0.8676 | 2.219  | 0.3358 | -865.213 |  |
| 11  | 10  | 312.5 | 107.5 | 0.201  | 0.4733 | 0.4246 | 0.812  | 2.5397 | 0.4246 | -860.652 |  |
| 12  | 1   | 304.3 | 115.7 | 0.1967 | 0.513  | 0.3835 | 0.8515 | 3.0959 | 0.3835 | -858.75  |  |
| 12  | 2   | 310.1 | 109.9 | 0.2259 | 0.497  | 0.4546 | 0.8906 | 2.4672 | 0.4546 | -880.913 |  |

|    |    |       |       |        |        |        |        |        |        |          |
|----|----|-------|-------|--------|--------|--------|--------|--------|--------|----------|
| 12 | 3  | 301.4 | 118.6 | 0.2408 | 0.5702 | 0.4222 | 1.0015 | 3.6002 | 0.4222 | -887.407 |
| 12 | 4  | 304.9 | 115.1 | 0.178  | 0.558  | 0.319  | 0.8466 | 2.4925 | 0.319  | -864.231 |
| 12 | 5  | 314.7 | 105.3 | 0.1914 | 0.5919 | 0.3233 | 0.8754 | 1.9165 | 0.3233 | -868.492 |
| 12 | 6  | 302.7 | 117.3 | 0.2056 | 0.5808 | 0.3539 | 0.931  | 3.3006 | 0.3539 | -868.955 |
| 12 | 7  | 304.3 | 115.7 | 0.1916 | 0.5337 | 0.359  | 0.8576 | 3.08   | 0.359  | -863.547 |
| 12 | 8  | 310.8 | 109.2 | 0.1921 | 0.4791 | 0.401  | 0.8002 | 2.221  | 0.401  | -861.85  |
| 12 | 9  | 303.5 | 116.5 | 0.1889 | 0.5618 | 0.3363 | 0.877  | 3.2377 | 0.3363 | -859.328 |
| 12 | 10 | 304.7 | 115.3 | 0.1766 | 0.5395 | 0.3274 | 0.8287 | 3.0921 | 0.3274 | -851.912 |
| 12 | 11 | 306.1 | 113.9 | 0.207  | 0.5799 | 0.3569 | 0.9244 | 2.7455 | 0.3569 | -876.934 |
| 13 | 1  | 324.3 | 95.7  | 0.1815 | 0.5434 | 0.3339 | 0.7918 | 1.526  | 0.3339 | -854.05  |
| 13 | 2  | 317.5 | 102.5 | 0.1767 | 0.3403 | 0.5192 | 0.6498 | 2.3243 | 0.5192 | -829.703 |
| 13 | 3  | 317.4 | 102.6 | 0.1635 | 0.4557 | 0.3587 | 0.7045 | 1.9908 | 0.3587 | -839.841 |
| 13 | 4  | 316.5 | 103.5 | 0.1877 | 0.4829 | 0.3887 | 0.7813 | 1.6485 | 0.3887 | -865.492 |
| 13 | 5  | 324.3 | 95.7  | 0.1861 | 0.5975 | 0.3114 | 0.8395 | 1.4801 | 0.3114 | -862.82  |
| 13 | 6  | 324.6 | 95.4  | 0.1282 | 0.5212 | 0.246  | 0.6524 | 1.2853 | 0.246  | -817.361 |
| 13 | 7  | 318.3 | 101.7 | 0.1265 | 0.4865 | 0.2599 | 0.641  | 1.9203 | 0.2599 | -816.725 |
| 13 | 8  | 324.1 | 95.9  | 0.1785 | 0.4976 | 0.3587 | 0.7541 | 1.4227 | 0.3587 | -854.755 |
| 13 | 9  | 314.1 | 105.9 | 0.1555 | 0.5629 | 0.2763 | 0.7746 | 2.304  | 0.2763 | -834.006 |
| 13 | 10 | 327.1 | 92.9  | 0.1551 | 0.5816 | 0.2667 | 0.7483 | 1.3271 | 0.2667 | -840.837 |
| 13 | 11 | 319.4 | 100.6 | 0.1785 | 0.503  | 0.3548 | 0.7687 | 1.8763 | 0.3548 | -850.461 |
| 13 | 12 | 315.2 | 104.8 | 0.2033 | 0.5708 | 0.3561 | 0.8849 | 1.9232 | 0.3561 | -875.893 |
| 14 | 1  | 309.4 | 110.6 | 0.2402 | 0.3765 | 0.6379 | 0.8283 | 2.5844 | 0.6379 | -866.388 |
| 14 | 2  | 312.4 | 107.6 | 0.2253 | 0.4143 | 0.5438 | 0.8211 | 2.4384 | 0.5438 | -868.654 |
| 14 | 3  | 308.6 | 111.4 | 0.2203 | 0.4565 | 0.4826 | 0.8488 | 2.5906 | 0.4826 | -873.17  |
| 14 | 4  | 304.9 | 115.1 | 0.2395 | 0.5171 | 0.4631 | 0.9466 | 2.5632 | 0.4631 | -892.087 |
| 14 | 5  | 318.3 | 101.7 | 0.2266 | 0.6601 | 0.3433 | 0.9947 | 1.6968 | 0.3433 | -890.482 |
| 14 | 6  | 309.9 | 110.1 | 0.2047 | 0.4729 | 0.4328 | 0.825  | 2.344  | 0.4328 | -865.574 |
| 14 | 7  | 308.6 | 111.4 | 0.2151 | 0.4607 | 0.4668 | 0.8406 | 2.6106 | 0.4668 | -868.368 |
| 14 | 8  | 316.2 | 103.8 | 0.2281 | 0.4739 | 0.4813 | 0.8666 | 1.7946 | 0.4813 | -879.879 |
| 14 | 9  | 308.8 | 111.2 | 0.247  | 0.4779 | 0.5168 | 0.9245 | 2.5486 | 0.5168 | -883.895 |
| 14 | 10 | 314.8 | 105.2 | 0.2402 | 0.4369 | 0.5498 | 0.8684 | 2.0287 | 0.5498 | -881.65  |
| 14 | 11 | 307.2 | 112.8 | 0.2452 | 0.515  | 0.4761 | 0.953  | 2.8501 | 0.4761 | -885.934 |
| 14 | 12 | 307   | 113   | 0.2408 | 0.4585 | 0.5253 | 0.8982 | 2.4278 | 0.5253 | -885.519 |
| 14 | 13 | 315.3 | 104.7 | 0.2163 | 0.4758 | 0.4545 | 0.8428 | 2.0977 | 0.4545 | -872.242 |
| 15 | 1  | 308.6 | 111.4 | 0.1804 | 0.6918 | 0.2607 | 0.948  | 2.6074 | 0.2607 | -864.072 |
| 15 | 2  | 314.8 | 105.2 | 0.2095 | 0.4066 | 0.5153 | 0.7766 | 2.0356 | 0.5153 | -863.152 |
| 15 | 3  | 309   | 111   | 0.2297 | 0.5159 | 0.4452 | 0.916  | 2.4763 | 0.4452 | -885.064 |
| 15 | 4  | 310.3 | 109.7 | 0.1501 | 0.7334 | 0.2047 | 0.9072 | 1.896  | 0.2047 | -859.313 |
| 15 | 5  | 314.4 | 105.6 | 0.1899 | 0.7762 | 0.2447 | 1.0121 | 1.9863 | 0.2447 | -877.832 |
| 15 | 6  | 311.7 | 108.3 | 0.1992 | 0.5519 | 0.3609 | 0.8704 | 2.0874 | 0.3609 | -870.74  |
| 15 | 7  | 313   | 107   | 0.2023 | 0.5488 | 0.3687 | 0.8718 | 2.0314 | 0.3687 | -876.446 |
| 15 | 8  | 314.3 | 105.7 | 0.2058 | 0.4501 | 0.4572 | 0.8018 | 1.9234 | 0.4572 | -868.594 |
| 15 | 9  | 310.2 | 109.8 | 0.2183 | 0.6858 | 0.3184 | 1.0216 | 2.3617 | 0.3184 | -887.161 |
| 15 | 10 | 313.3 | 106.7 | 0.2111 | 0.5498 | 0.384  | 0.8915 | 2.1008 | 0.384  | -879.857 |
| 15 | 11 | 313.7 | 106.3 | 0.1661 | 0.5066 | 0.3279 | 0.7568 | 1.924  | 0.3279 | -850.539 |
| 15 | 12 | 308   | 112   | 0.1712 | 0.5377 | 0.3183 | 0.8069 | 2.3115 | 0.3183 | -858.669 |
| 15 | 13 | 321.2 | 98.8  | 0.2025 | 0.502  | 0.4035 | 0.8191 | 1.4768 | 0.4035 | -870.812 |
| 15 | 14 | 310.4 | 109.6 | 0.204  | 0.5924 | 0.3444 | 0.9162 | 2.1355 | 0.3444 | -876.452 |
| 16 | 1  | 306.3 | 113.7 | 0.209  | 0.4121 | 0.5073 | 0.7921 | 3.1074 | 0.5073 | -857.521 |
| 16 | 2  | 307.5 | 112.5 | 0.2051 | 0.4891 | 0.4194 | 0.8436 | 3.2273 | 0.4194 | -861.935 |
| 16 | 3  | 303.5 | 116.5 | 0.1957 | 0.4479 | 0.437  | 0.797  | 3.4884 | 0.437  | -854.546 |
| 16 | 4  | 306.5 | 113.5 | 0.1593 | 0.5412 | 0.2944 | 0.7875 | 2.3756 | 0.2944 | -852.074 |
| 16 | 5  | 310.4 | 109.6 | 0.158  | 0.6954 | 0.2272 | 0.8947 | 2.4426 | 0.2272 | -852.068 |
| 16 | 6  | 307.6 | 112.4 | 0.1431 | 0.4346 | 0.3292 | 0.6633 | 2.6385 | 0.3292 | -822.641 |
| 16 | 7  | 305.1 | 114.9 | 0.1789 | 0.4259 | 0.4202 | 0.7396 | 3.2003 | 0.4202 | -845.098 |
| 16 | 8  | 313.3 | 106.7 | 0.1789 | 0.5156 | 0.347  | 0.7933 | 2.0445 | 0.347  | -860.673 |
| 16 | 9  | 302.7 | 117.3 | 0.2041 | 0.5338 | 0.3824 | 0.8886 | 3.4886 | 0.3824 | -864.376 |
| 16 | 10 | 312.3 | 107.7 | 0.166  | 0.4386 | 0.3785 | 0.7077 | 2.3325 | 0.3785 | -840.736 |
| 16 | 11 | 303.7 | 116.3 | 0.1748 | 0.502  | 0.3482 | 0.7963 | 3.5811 | 0.3482 | -847.258 |
| 16 | 12 | 301.9 | 118.1 | 0.1939 | 0.5254 | 0.3691 | 0.8614 | 3.245  | 0.3691 | -865.144 |
| 16 | 13 | 317.3 | 102.7 | 0.1743 | 0.4448 | 0.3918 | 0.7214 | 1.9032 | 0.3918 | -845.312 |
| 16 | 14 | 304.2 | 115.8 | 0.2316 | 0.4707 | 0.492  | 0.8926 | 3.057  | 0.492  | -878.67  |
| 16 | 15 | 311.7 | 108.3 | 0.1632 | 0.5932 | 0.2751 | 0.8224 | 2.0013 | 0.2751 | -858.343 |
| 17 | 1  | 314.4 | 105.6 | 0.1463 | 0.5438 | 0.2691 | 0.7388 | 2.2953 | 0.2691 | -828.406 |

|    |    |       |       |        |        |        |        |        |        |          |
|----|----|-------|-------|--------|--------|--------|--------|--------|--------|----------|
| 17 | 2  | 318.9 | 101.1 | 0.1586 | 0.5632 | 0.2816 | 0.7679 | 2.0497 | 0.2816 | -838.089 |
| 17 | 3  | 312.9 | 107.1 | 0.1656 | 0.5765 | 0.2873 | 0.8112 | 2.4084 | 0.2873 | -847.877 |
| 17 | 4  | 313.7 | 106.3 | 0.1699 | 0.63   | 0.2696 | 0.859  | 1.8552 | 0.2696 | -863.224 |
| 17 | 5  | 317.1 | 102.9 | 0.1396 | 0.7071 | 0.1974 | 0.8361 | 1.9766 | 0.1974 | -835.074 |
| 17 | 6  | 317.3 | 102.7 | 0.1646 | 0.5806 | 0.2836 | 0.799  | 1.8786 | 0.2836 | -847.887 |
| 17 | 7  | 310   | 110   | 0.1596 | 0.5109 | 0.3123 | 0.7547 | 2.8066 | 0.3123 | -838.01  |
| 17 | 8  | 317.3 | 102.7 | 0.1491 | 0.7076 | 0.2107 | 0.857  | 1.9105 | 0.2107 | -846.857 |
| 17 | 9  | 309.4 | 110.6 | 0.1507 | 0.8127 | 0.1854 | 0.975  | 2.8491 | 0.1854 | -843.151 |
| 17 | 10 | 314.9 | 105.1 | 0.1618 | 0.554  | 0.292  | 0.7797 | 2.3211 | 0.292  | -843.328 |
| 17 | 11 | 314.8 | 105.2 | 0.1966 | 0.6111 | 0.3217 | 0.9011 | 2.2361 | 0.3217 | -866.524 |
| 17 | 12 | 311.4 | 108.6 | 0.1954 | 0.4118 | 0.4744 | 0.7539 | 2.2425 | 0.4744 | -856.25  |
| 17 | 13 | 323.2 | 96.8  | 0.1664 | 0.7837 | 0.2123 | 0.926  | 1.6401 | 0.2123 | -858.756 |
| 17 | 14 | 315.2 | 104.8 | 0.2129 | 0.4173 | 0.5101 | 0.7917 | 2.012  | 0.5101 | -860.5   |
| 17 | 15 | 318.3 | 101.7 | 0.166  | 0.6697 | 0.2479 | 0.8639 | 1.6538 | 0.2479 | -857.142 |
| 17 | 16 | 313.9 | 106.1 | 0.1854 | 0.581  | 0.3192 | 0.8562 | 2.185  | 0.3192 | -864.084 |
| 18 | 1  | 304.4 | 115.6 | 0.1871 | 0.415  | 0.4508 | 0.7495 | 3.5548 | 0.4508 | -840.012 |
| 18 | 2  | 302.1 | 117.9 | 0.1896 | 0.4058 | 0.4672 | 0.7508 | 4.5914 | 0.4672 | -837.238 |
| 18 | 3  | 299.6 | 120.4 | 0.1868 | 0.3442 | 0.5425 | 0.6957 | 4.5062 | 0.5425 | -830.947 |
| 18 | 4  | 300.7 | 119.3 | 0.1977 | 0.4392 | 0.4503 | 0.799  | 3.3522 | 0.4503 | -860.413 |
| 18 | 5  | 309.4 | 110.6 | 0.1867 | 0.395  | 0.4725 | 0.7247 | 2.5878 | 0.4725 | -848.765 |
| 18 | 6  | 300.1 | 119.9 | 0.1907 | 0.4735 | 0.4027 | 0.8143 | 4.0863 | 0.4027 | -849.626 |
| 18 | 7  | 300.6 | 119.4 | 0.1967 | 0.416  | 0.4728 | 0.7771 | 4.2468 | 0.4728 | -848.248 |
| 18 | 8  | 310.1 | 109.9 | 0.1965 | 0.4621 | 0.4252 | 0.798  | 2.4071 | 0.4252 | -862.353 |
| 18 | 9  | 304.8 | 115.2 | 0.1609 | 0.5261 | 0.3059 | 0.7834 | 3.1364 | 0.3059 | -838.44  |
| 18 | 10 | 307.9 | 112.1 | 0.1728 | 0.3374 | 0.5123 | 0.6502 | 3.0033 | 0.5123 | -829.015 |
| 18 | 11 | 306.2 | 113.8 | 0.1732 | 0.458  | 0.3783 | 0.7512 | 3.2324 | 0.3783 | -841.474 |
| 18 | 12 | 296.7 | 123.3 | 0.253  | 0.436  | 0.5803 | 0.9201 | 4.4178 | 0.5803 | -878.751 |
| 18 | 13 | 311.2 | 108.8 | 0.176  | 0.4696 | 0.3748 | 0.7561 | 2.6679 | 0.3748 | -847.029 |
| 18 | 14 | 298.6 | 121.4 | 0.2615 | 0.4007 | 0.6524 | 0.9052 | 4.3011 | 0.6524 | -876.311 |
| 18 | 15 | 304.3 | 115.7 | 0.2181 | 0.4253 | 0.5127 | 0.8256 | 3.0124 | 0.5127 | -869.388 |
| 18 | 16 | 299.1 | 120.9 | 0.2248 | 0.4291 | 0.5239 | 0.8507 | 4.2664 | 0.5239 | -865.93  |
| 18 | 17 | 306.9 | 113.1 | 0.1726 | 0.5468 | 0.3156 | 0.82   | 3.2302 | 0.3156 | -846.832 |
| 19 | 1  | 306.5 | 113.5 | 0.2008 | 0.4184 | 0.4799 | 0.7788 | 3.1347 | 0.4799 | -849.613 |
| 19 | 2  | 308   | 112   | 0.253  | 0.4355 | 0.5809 | 0.9049 | 3.1835 | 0.5809 | -878.726 |
| 19 | 3  | 304.8 | 115.2 | 0.2613 | 0.3711 | 0.7041 | 0.8743 | 3.2963 | 0.7041 | -878.626 |
| 19 | 4  | 307.5 | 112.5 | 0.173  | 0.4746 | 0.3645 | 0.7613 | 2.3389 | 0.3645 | -852.208 |
| 19 | 5  | 308.4 | 111.6 | 0.2069 | 0.5536 | 0.3738 | 0.8971 | 2.7312 | 0.3738 | -868.898 |
| 19 | 6  | 306.7 | 113.3 | 0.1989 | 0.4892 | 0.4065 | 0.8316 | 2.8316 | 0.4065 | -861.118 |
| 19 | 7  | 306.2 | 113.8 | 0.199  | 0.4135 | 0.4814 | 0.7714 | 3.0816 | 0.4814 | -854.615 |
| 19 | 8  | 308.4 | 111.6 | 0.2347 | 0.4133 | 0.5679 | 0.8464 | 2.6526 | 0.5679 | -874.29  |
| 19 | 9  | 304.3 | 115.7 | 0.2256 | 0.6118 | 0.3687 | 0.9959 | 3.2849 | 0.3687 | -879.468 |
| 19 | 10 | 313.6 | 106.4 | 0.2329 | 0.3674 | 0.6339 | 0.8009 | 2.2129 | 0.6339 | -870.068 |
| 19 | 11 | 305.4 | 114.6 | 0.2339 | 0.4163 | 0.5618 | 0.851  | 3.2923 | 0.5618 | -870.361 |
| 19 | 12 | 301.6 | 118.4 | 0.2252 | 0.3997 | 0.5634 | 0.8232 | 3.3871 | 0.5634 | -867.449 |
| 19 | 13 | 312.3 | 107.7 | 0.2387 | 0.5124 | 0.4659 | 0.9267 | 2.4973 | 0.4659 | -881.423 |
| 19 | 14 | 306.2 | 113.8 | 0.3103 | 0.3559 | 0.8719 | 0.9681 | 2.8145 | 0.8719 | -900.133 |
| 19 | 15 | 307.7 | 112.3 | 0.2102 | 0.5071 | 0.4145 | 0.8687 | 2.5329 | 0.4145 | -871.461 |
| 19 | 16 | 307.3 | 112.7 | 0.1871 | 0.4158 | 0.4501 | 0.7455 | 2.7007 | 0.4501 | -852.07  |
| 19 | 17 | 316.1 | 103.9 | 0.1816 | 0.4301 | 0.4222 | 0.7291 | 1.9529 | 0.4222 | -847.144 |
| 19 | 18 | 303.6 | 116.4 | 0.262  | 0.3438 | 0.7622 | 0.8542 | 3.4028 | 0.7622 | -875.031 |
| 20 | 1  | 314.2 | 105.8 | 0.2122 | 0.5553 | 0.3821 | 0.8959 | 1.8867 | 0.3821 | -881.857 |
| 20 | 2  | 319   | 101   | 0.2112 | 0.5578 | 0.3786 | 0.8836 | 1.5242 | 0.3786 | -884.065 |
| 20 | 3  | 314.7 | 105.3 | 0.1877 | 0.5688 | 0.33   | 0.8497 | 1.7031 | 0.33   | -874.882 |
| 20 | 4  | 309.1 | 110.9 | 0.1933 | 0.5802 | 0.3332 | 0.8862 | 1.8166 | 0.3332 | -881.471 |
| 20 | 5  | 318.8 | 101.2 | 0.2001 | 0.9195 | 0.2177 | 1.1206 | 1.5032 | 0.2177 | -896.931 |
| 20 | 6  | 312.2 | 107.8 | 0.1594 | 0.5772 | 0.2761 | 0.7998 | 1.8497 | 0.2761 | -850.258 |
| 20 | 7  | 315.5 | 104.5 | 0.1766 | 0.6002 | 0.2942 | 0.8458 | 1.6487 | 0.2942 | -870.38  |
| 20 | 8  | 317.6 | 102.4 | 0.1997 | 0.6196 | 0.3224 | 0.9063 | 1.5089 | 0.3224 | -884.66  |
| 20 | 9  | 312.4 | 107.6 | 0.2074 | 0.5603 | 0.3701 | 0.8933 | 1.9529 | 0.3701 | -877.609 |
| 20 | 10 | 313.9 | 106.1 | 0.2029 | 0.5532 | 0.3668 | 0.8743 | 1.9206 | 0.3668 | -879.02  |
| 20 | 11 | 315   | 105   | 0.1756 | 0.657  | 0.2673 | 0.8878 | 1.6748 | 0.2673 | -871.708 |
| 20 | 12 | 308.2 | 111.8 | 0.2036 | 0.5789 | 0.3517 | 0.9103 | 2.0808 | 0.3517 | -883.951 |
| 20 | 13 | 327   | 93    | 0.1704 | 0.4698 | 0.3627 | 0.7102 | 0.9775 | 0.3627 | -851.39  |
| 20 | 14 | 310   | 110   | 0.2032 | 0.3778 | 0.538  | 0.7468 | 2.021  | 0.538  | -860.188 |

|    |    |       |       |        |        |        |        |        |        |          |
|----|----|-------|-------|--------|--------|--------|--------|--------|--------|----------|
| 20 | 15 | 314.6 | 105.4 | 0.1786 | 0.6531 | 0.2735 | 0.8932 | 1.5227 | 0.2735 | -874.233 |
| 20 | 16 | 308.9 | 111.1 | 0.1822 | 0.5451 | 0.3342 | 0.8345 | 2.1488 | 0.3342 | -866.836 |
| 20 | 17 | 316.9 | 103.1 | 0.1718 | 0.5853 | 0.2936 | 0.82   | 1.66   | 0.2936 | -859.099 |
| 20 | 18 | 305.1 | 114.9 | 0.2193 | 0.5603 | 0.3914 | 0.9377 | 2.6979 | 0.3914 | -886.756 |
| 20 | 19 | 312.7 | 107.3 | 0.2183 | 0.5552 | 0.3932 | 0.9131 | 1.7981 | 0.3932 | -890.704 |
| 21 | 1  | 319.7 | 100.3 | 0.1382 | 0.4884 | 0.283  | 0.6655 | 2.1013 | 0.283  | -819.463 |
| 21 | 2  | 324.8 | 95.2  | 0.1798 | 0.5225 | 0.3442 | 0.7725 | 1.7722 | 0.3442 | -855.032 |
| 21 | 3  | 317.8 | 102.2 | 0.1746 | 0.4522 | 0.3861 | 0.7264 | 2.1257 | 0.3861 | -845.633 |
| 21 | 4  | 315.2 | 104.8 | 0.15   | 0.4711 | 0.3184 | 0.6903 | 1.975  | 0.3184 | -837.899 |
| 21 | 5  | 331.8 | 88.2  | 0.1077 | 0.7033 | 0.1531 | 0.6983 | 1.1392 | 0.1531 | -815.299 |
| 21 | 6  | 312   | 108   | 0.1502 | 0.5753 | 0.2611 | 0.7785 | 2.7877 | 0.2611 | -832.847 |
| 21 | 7  | 317.3 | 102.7 | 0.1167 | 0.4962 | 0.2352 | 0.6284 | 2.2284 | 0.2352 | -806.707 |
| 21 | 8  | 319.4 | 100.6 | 0.1555 | 0.5864 | 0.2652 | 0.7761 | 1.9506 | 0.2652 | -845.792 |
| 21 | 9  | 311.8 | 108.2 | 0.1351 | 0.7467 | 0.1809 | 0.8782 | 2.8027 | 0.1809 | -828.815 |
| 21 | 10 | 327.3 | 92.7  | 0.1439 | 0.5834 | 0.2466 | 0.7228 | 1.4759 | 0.2466 | -836.65  |
| 21 | 11 | 322.8 | 97.2  | 0.1635 | 0.4709 | 0.3472 | 0.7039 | 1.7518 | 0.3472 | -839.875 |
| 21 | 12 | 312.2 | 107.8 | 0.1765 | 0.6136 | 0.2877 | 0.8662 | 2.4343 | 0.2877 | -861.098 |
| 21 | 13 | 338.3 | 81.7  | 0.139  | 0.5435 | 0.2557 | 0.6529 | 0.8251 | 0.2557 | -823.952 |
| 21 | 14 | 322.5 | 97.5  | 0.2175 | 0.5363 | 0.4056 | 0.8746 | 1.6199 | 0.4056 | -879.63  |
| 21 | 15 | 319.8 | 100.2 | 0.1752 | 0.5979 | 0.2931 | 0.8283 | 1.7511 | 0.2931 | -863.202 |
| 21 | 16 | 318.3 | 101.7 | 0.152  | 0.4988 | 0.3047 | 0.7079 | 2.0311 | 0.3047 | -838.368 |
| 21 | 17 | 323.5 | 96.5  | 0.1479 | 0.6151 | 0.2405 | 0.7657 | 1.7547 | 0.2405 | -837.74  |
| 21 | 18 | 312.1 | 107.9 | 0.1858 | 0.4019 | 0.4624 | 0.7241 | 2.9061 | 0.4624 | -846.991 |
| 21 | 19 | 314   | 106   | 0.2059 | 0.4638 | 0.4439 | 0.8129 | 2.5433 | 0.4439 | -861.049 |
| 21 | 20 | 324.8 | 95.2  | 0.1671 | 0.5171 | 0.3231 | 0.7393 | 1.2661 | 0.3231 | -850.712 |
| 22 | 1  | 317.3 | 102.7 | 0.1702 | 0.4781 | 0.356  | 0.7364 | 1.8777 | 0.356  | -842.579 |
| 22 | 2  | 315.4 | 104.6 | 0.1607 | 0.4637 | 0.3466 | 0.7086 | 2.1659 | 0.3466 | -835.558 |
| 22 | 3  | 307.7 | 112.3 | 0.149  | 0.4079 | 0.3652 | 0.6546 | 2.8553 | 0.3652 | -819.486 |
| 22 | 4  | 313   | 107   | 0.1925 | 0.5024 | 0.3831 | 0.8143 | 1.8253 | 0.3831 | -871.642 |
| 22 | 5  | 320.4 | 99.6  | 0.1681 | 0.5728 | 0.2935 | 0.7924 | 1.6299 | 0.2935 | -850.241 |
| 22 | 6  | 314.6 | 105.4 | 0.1491 | 0.4097 | 0.3638 | 0.6434 | 1.9616 | 0.3638 | -825.015 |
| 22 | 7  | 307.6 | 112.4 | 0.1325 | 0.3802 | 0.3484 | 0.5964 | 2.8791 | 0.3484 | -804.794 |
| 22 | 8  | 308.6 | 111.4 | 0.1872 | 0.4388 | 0.4266 | 0.7617 | 2.6588 | 0.4266 | -847.2   |
| 22 | 9  | 312.3 | 107.7 | 0.1391 | 0.5213 | 0.2667 | 0.7112 | 2.2794 | 0.2667 | -819.777 |
| 22 | 10 | 314.6 | 105.4 | 0.1794 | 0.4295 | 0.4177 | 0.7265 | 2.1431 | 0.4177 | -845.8   |
| 22 | 11 | 306.1 | 113.9 | 0.2067 | 0.4391 | 0.4707 | 0.8091 | 3.1216 | 0.4707 | -856.026 |
| 22 | 12 | 311.8 | 108.2 | 0.1883 | 0.5933 | 0.3173 | 0.8778 | 2.0669 | 0.3173 | -871.439 |
| 22 | 13 | 324.4 | 95.6  | 0.124  | 0.4722 | 0.2626 | 0.6098 | 1.4003 | 0.2626 | -812.919 |
| 22 | 14 | 308.3 | 111.7 | 0.1666 | 0.4568 | 0.3646 | 0.7312 | 2.5542 | 0.3646 | -838.832 |
| 22 | 15 | 316   | 104   | 0.1996 | 0.5323 | 0.3749 | 0.8459 | 1.735  | 0.3749 | -872.962 |
| 22 | 16 | 307.1 | 112.9 | 0.2019 | 0.4534 | 0.4452 | 0.8085 | 2.756  | 0.4452 | -862.188 |
| 22 | 17 | 316.1 | 103.9 | 0.1656 | 0.6054 | 0.2736 | 0.8234 | 2.0261 | 0.2736 | -847.236 |
| 22 | 18 | 304.8 | 115.2 | 0.1703 | 0.2876 | 0.5923 | 0.6074 | 3.1348 | 0.5923 | -821.306 |
| 22 | 19 | 302.6 | 117.4 | 0.2758 | 0.4468 | 0.6172 | 0.9708 | 3.5502 | 0.6172 | -888.159 |
| 22 | 20 | 316.7 | 103.3 | 0.1789 | 0.5983 | 0.299  | 0.8461 | 1.5351 | 0.299  | -867.398 |
| 22 | 21 | 321.1 | 98.9  | 0.147  | 0.4887 | 0.3008 | 0.6823 | 1.7989 | 0.3008 | -830.576 |
| 23 | 1  | 311.8 | 108.2 | 0.1622 | 0.5246 | 0.3091 | 0.7665 | 2.1056 | 0.3091 | -848.992 |
| 23 | 2  | 316.6 | 103.4 | 0.1811 | 0.4581 | 0.3954 | 0.748  | 1.6487 | 0.3954 | -860.019 |
| 23 | 3  | 310.2 | 109.8 | 0.1852 | 0.4837 | 0.3829 | 0.7896 | 2.1259 | 0.3829 | -863.591 |
| 23 | 4  | 304.8 | 115.2 | 0.1713 | 0.4738 | 0.3616 | 0.7628 | 2.3496 | 0.3616 | -855.264 |
| 23 | 5  | 314.2 | 105.8 | 0.1908 | 0.5695 | 0.3351 | 0.8586 | 1.8703 | 0.3351 | -870.331 |
| 23 | 6  | 305   | 115   | 0.1893 | 0.4872 | 0.3884 | 0.8126 | 2.6529 | 0.3884 | -862.227 |
| 23 | 7  | 307.2 | 112.8 | 0.1993 | 0.5212 | 0.3823 | 0.8571 | 2.5189 | 0.3823 | -871.431 |
| 23 | 8  | 310.8 | 109.2 | 0.2083 | 0.5581 | 0.3731 | 0.8976 | 2.0943 | 0.3731 | -883.027 |
| 23 | 9  | 308.8 | 111.2 | 0.1868 | 0.5718 | 0.3268 | 0.8664 | 2.3108 | 0.3268 | -866.295 |
| 23 | 10 | 314.1 | 105.9 | 0.193  | 0.4642 | 0.4159 | 0.7842 | 1.85   | 0.4159 | -866.479 |
| 23 | 11 | 308.2 | 111.8 | 0.1975 | 0.5036 | 0.3922 | 0.8369 | 2.3496 | 0.3922 | -870.811 |
| 23 | 12 | 304.1 | 115.9 | 0.1846 | 0.4994 | 0.3696 | 0.8145 | 2.5905 | 0.3696 | -861.624 |
| 23 | 13 | 317.9 | 102.1 | 0.1991 | 0.5009 | 0.3975 | 0.8174 | 1.5601 | 0.3975 | -872.547 |
| 23 | 14 | 309.9 | 110.1 | 0.2243 | 0.5124 | 0.4376 | 0.8995 | 1.9967 | 0.4376 | -885.224 |
| 23 | 15 | 311.7 | 108.3 | 0.1835 | 0.5584 | 0.3286 | 0.8403 | 1.7778 | 0.3286 | -871.514 |
| 23 | 16 | 307.4 | 112.6 | 0.2005 | 0.4662 | 0.43   | 0.8151 | 2.2679 | 0.43   | -871.806 |
| 23 | 17 | 315.8 | 104.2 | 0.1756 | 0.5666 | 0.31   | 0.8179 | 1.6951 | 0.31   | -861.267 |
| 23 | 18 | 301.6 | 118.4 | 0.2248 | 0.364  | 0.6176 | 0.7921 | 3.1361 | 0.6176 | -869.001 |

|    |    |       |       |        |        |        |        |        |        |          |
|----|----|-------|-------|--------|--------|--------|--------|--------|--------|----------|
| 23 | 19 | 307.7 | 112.3 | 0.1832 | 0.4474 | 0.4095 | 0.7614 | 2.3166 | 0.4095 | -856.712 |
| 23 | 20 | 309   | 111   | 0.1896 | 0.4881 | 0.3884 | 0.8053 | 1.8437 | 0.3884 | -870.673 |
| 23 | 21 | 318.7 | 101.3 | 0.1613 | 0.5105 | 0.316  | 0.7366 | 1.6929 | 0.316  | -849.193 |
| 23 | 22 | 315.6 | 104.4 | 0.1918 | 0.4638 | 0.4135 | 0.7783 | 1.6181 | 0.4135 | -867.63  |
| 24 | 1  | 315.5 | 104.5 | 0.1699 | 0.529  | 0.3212 | 0.7776 | 1.9543 | 0.3212 | -848.401 |
| 24 | 2  | 306.9 | 113.1 | 0.1598 | 0.4462 | 0.3581 | 0.7108 | 2.9848 | 0.3581 | -834.615 |
| 24 | 3  | 303.2 | 116.8 | 0.1668 | 0.4416 | 0.3777 | 0.7297 | 3.3401 | 0.3777 | -838.009 |
| 24 | 4  | 313.3 | 106.7 | 0.1747 | 0.4833 | 0.3615 | 0.7593 | 1.7003 | 0.3615 | -862.434 |
| 24 | 5  | 320.1 | 99.9  | 0.162  | 0.6234 | 0.2598 | 0.8151 | 1.5854 | 0.2598 | -853.858 |
| 24 | 6  | 306.7 | 113.3 | 0.1434 | 0.5002 | 0.2866 | 0.7189 | 2.6351 | 0.2866 | -828.816 |
| 24 | 7  | 309.8 | 110.2 | 0.1421 | 0.3902 | 0.364  | 0.6215 | 2.4228 | 0.364  | -822.34  |
| 24 | 8  | 312.2 | 107.8 | 0.1879 | 0.4543 | 0.4136 | 0.7689 | 2.1609 | 0.4136 | -858.025 |
| 24 | 9  | 303.7 | 116.3 | 0.1568 | 0.6079 | 0.2579 | 0.8452 | 3.2032 | 0.2579 | -838.838 |
| 24 | 10 | 321.8 | 98.2  | 0.1569 | 0.4624 | 0.3393 | 0.6851 | 1.4217 | 0.3393 | -841.399 |
| 24 | 11 | 310.1 | 109.9 | 0.1899 | 0.4845 | 0.3918 | 0.8008 | 2.3452 | 0.3918 | -860.529 |
| 24 | 12 | 304.7 | 115.3 | 0.2205 | 0.4533 | 0.4864 | 0.8533 | 2.7637 | 0.4864 | -876.251 |
| 24 | 13 | 312.1 | 107.9 | 0.1271 | 0.4131 | 0.3077 | 0.6016 | 2.3012 | 0.3077 | -808.351 |
| 24 | 14 | 301.6 | 118.4 | 0.1976 | 0.3935 | 0.5021 | 0.7584 | 3.3059 | 0.5021 | -851.573 |
| 24 | 15 | 309.4 | 110.6 | 0.1927 | 0.5288 | 0.3645 | 0.8438 | 2.2285 | 0.3645 | -868.717 |
| 24 | 16 | 306.7 | 113.3 | 0.1809 | 0.4282 | 0.4226 | 0.7428 | 2.5909 | 0.4226 | -850.745 |
| 24 | 17 | 315.4 | 104.6 | 0.1341 | 0.5951 | 0.2254 | 0.7468 | 1.9078 | 0.2254 | -830.535 |
| 24 | 18 | 300.4 | 119.6 | 0.1592 | 0.3933 | 0.4047 | 0.6776 | 3.6523 | 0.4047 | -827.915 |
| 24 | 19 | 304.8 | 115.2 | 0.2177 | 0.3745 | 0.5813 | 0.7821 | 2.9682 | 0.5813 | -861.237 |
| 24 | 20 | 312.5 | 107.5 | 0.1621 | 0.5694 | 0.2847 | 0.799  | 1.7381 | 0.2847 | -858.476 |
| 24 | 21 | 321.1 | 98.9  | 0.1443 | 0.5968 | 0.2418 | 0.7526 | 1.66   | 0.2418 | -839.866 |
| 24 | 22 | 310.8 | 109.2 | 0.1261 | 0.4609 | 0.2735 | 0.6394 | 2.2395 | 0.2735 | -815.451 |
| 24 | 23 | 315.5 | 104.5 | 0.161  | 0.606  | 0.2657 | 0.8152 | 1.5386 | 0.2657 | -860.475 |
| 25 | 1  | 302.8 | 117.2 | 0.1366 | 0.4356 | 0.3136 | 0.6602 | 3.4332 | 0.3136 | -812.103 |
| 25 | 2  | 310   | 110   | 0.2026 | 0.4754 | 0.4261 | 0.8222 | 2.572  | 0.4261 | -863.339 |
| 25 | 3  | 308.9 | 111.1 | 0.1657 | 0.4383 | 0.3781 | 0.7134 | 2.5048 | 0.3781 | -836.482 |
| 25 | 4  | 304.3 | 115.7 | 0.1742 | 0.4487 | 0.3883 | 0.7496 | 2.7163 | 0.3883 | -849.38  |
| 25 | 5  | 319.4 | 100.6 | 0.1313 | 0.4955 | 0.265  | 0.6556 | 1.6066 | 0.265  | -822.021 |
| 25 | 6  | 306.4 | 113.6 | 0.1631 | 0.5839 | 0.2794 | 0.8308 | 2.8035 | 0.2794 | -845.664 |
| 25 | 7  | 311.5 | 108.5 | 0.1365 | 0.392  | 0.3482 | 0.6075 | 2.2182 | 0.3482 | -816.766 |
| 25 | 8  | 313.6 | 106.4 | 0.1655 | 0.6024 | 0.2747 | 0.8284 | 2.0252 | 0.2747 | -856.338 |
| 25 | 9  | 303   | 117   | 0.1368 | 0.6291 | 0.2174 | 0.8217 | 3.4365 | 0.2174 | -823.116 |
| 25 | 10 | 311.8 | 108.2 | 0.1456 | 0.4534 | 0.3212 | 0.6748 | 2.2614 | 0.3212 | -826.305 |
| 25 | 11 | 310   | 110   | 0.1628 | 0.493  | 0.3303 | 0.748  | 2.3273 | 0.3303 | -842.648 |
| 25 | 12 | 304.1 | 115.9 | 0.1831 | 0.5832 | 0.314  | 0.8805 | 2.8736 | 0.314  | -862.293 |
| 25 | 13 | 315.2 | 104.8 | 0.1733 | 0.4984 | 0.3477 | 0.7633 | 1.9943 | 0.3477 | -846.951 |
| 25 | 14 | 305.2 | 114.8 | 0.2254 | 0.5138 | 0.4388 | 0.9126 | 2.7761 | 0.4388 | -876.433 |
| 25 | 15 | 311.1 | 108.9 | 0.1829 | 0.6699 | 0.2731 | 0.9275 | 2.0546 | 0.2731 | -874.493 |
| 25 | 16 | 306.5 | 113.5 | 0.176  | 0.4238 | 0.4153 | 0.7288 | 2.6459 | 0.4153 | -846.499 |
| 25 | 17 | 309.2 | 110.8 | 0.1526 | 0.5412 | 0.2819 | 0.7651 | 2.5889 | 0.2819 | -833.66  |
| 25 | 18 | 297.7 | 122.3 | 0.1706 | 0.413  | 0.4131 | 0.7236 | 4.3226 | 0.4131 | -830.358 |
| 25 | 19 | 306.2 | 113.8 | 0.2178 | 0.4399 | 0.4952 | 0.8339 | 2.749  | 0.4952 | -869.139 |
| 25 | 20 | 313.2 | 106.8 | 0.1849 | 0.484  | 0.3821 | 0.783  | 1.6849 | 0.3821 | -863.839 |
| 25 | 21 | 321.8 | 98.2  | 0.1045 | 0.4829 | 0.2163 | 0.5788 | 1.5552 | 0.2163 | -799.515 |
| 25 | 22 | 316.5 | 103.5 | 0.1506 | 0.482  | 0.3124 | 0.6967 | 1.7106 | 0.3124 | -833.654 |
| 25 | 23 | 307.4 | 112.6 | 0.1775 | 0.5218 | 0.3401 | 0.8093 | 2.2858 | 0.3401 | -861.007 |
| 25 | 24 | 309.1 | 110.9 | 0.1711 | 0.5064 | 0.3378 | 0.779  | 2.3166 | 0.3378 | -851.174 |
| 26 | 1  | 314.8 | 105.2 | 0.1974 | 0.7115 | 0.2775 | 0.9786 | 1.9656 | 0.2775 | -879.489 |
| 26 | 2  | 316.6 | 103.4 | 0.2178 | 0.5892 | 0.3696 | 0.9276 | 1.8616 | 0.3696 | -883.696 |
| 26 | 3  | 312.5 | 107.5 | 0.1993 | 0.567  | 0.3516 | 0.8802 | 2.0915 | 0.3516 | -873.357 |
| 26 | 4  | 308.8 | 111.2 | 0.1941 | 0.6973 | 0.2784 | 0.9821 | 2.0939 | 0.2784 | -883.072 |
| 26 | 5  | 327.6 | 92.4  | 0.1595 | 0.9073 | 0.1758 | 0.9718 | 1.0815 | 0.1758 | -869.404 |
| 26 | 6  | 315.1 | 104.9 | 0.1814 | 0.6541 | 0.2774 | 0.8984 | 1.7612 | 0.2774 | -870.315 |
| 26 | 7  | 318.1 | 101.9 | 0.1848 | 0.6732 | 0.2745 | 0.9099 | 1.5822 | 0.2745 | -876.119 |
| 26 | 8  | 320.4 | 99.6  | 0.1673 | 0.7568 | 0.2211 | 0.9212 | 1.4501 | 0.2211 | -867.501 |
| 26 | 9  | 313.8 | 106.2 | 0.1965 | 0.9207 | 0.2134 | 1.1386 | 2.0038 | 0.2134 | -886.723 |
| 26 | 10 | 318.6 | 101.4 | 0.2081 | 0.6331 | 0.3286 | 0.9319 | 1.6281 | 0.3286 | -888.427 |
| 26 | 11 | 315.6 | 104.4 | 0.1859 | 0.7049 | 0.2636 | 0.9446 | 1.7666 | 0.2636 | -879.238 |
| 26 | 12 | 310.5 | 109.5 | 0.2065 | 0.7708 | 0.2679 | 1.0609 | 2.0592 | 0.2679 | -892.979 |
| 26 | 13 | 314.7 | 105.3 | 0.1896 | 0.679  | 0.2792 | 0.9369 | 2.0906 | 0.2792 | -872.945 |

|    |    |       |       |        |        |        |        |        |        |          |
|----|----|-------|-------|--------|--------|--------|--------|--------|--------|----------|
| 26 | 14 | 314.5 | 105.5 | 0.1887 | 0.6457 | 0.2922 | 0.9105 | 1.7673 | 0.2922 | -870.496 |
| 26 | 15 | 313.2 | 106.8 | 0.1782 | 0.6077 | 0.2932 | 0.8621 | 1.8388 | 0.2932 | -866.622 |
| 26 | 16 | 311.3 | 108.7 | 0.1529 | 0.734  | 0.2083 | 0.9099 | 2.0808 | 0.2083 | -859.337 |
| 26 | 17 | 322.8 | 97.2  | 0.1655 | 0.7314 | 0.2262 | 0.8894 | 1.3201 | 0.2262 | -862.699 |
| 26 | 18 | 306.7 | 113.3 | 0.2173 | 0.5578 | 0.3896 | 0.9276 | 2.6845 | 0.3896 | -883.278 |
| 26 | 19 | 310.2 | 109.8 | 0.2024 | 0.5705 | 0.3548 | 0.8959 | 2.2497 | 0.3548 | -876.446 |
| 26 | 20 | 320   | 100   | 0.155  | 0.7456 | 0.2079 | 0.8871 | 1.1487 | 0.2079 | -866.301 |
| 26 | 21 | 324.5 | 95.5  | 0.1731 | 0.7387 | 0.2343 | 0.9051 | 1.3783 | 0.2343 | -870.776 |
| 26 | 22 | 316.8 | 103.2 | 0.1711 | 0.6456 | 0.265  | 0.863  | 1.692  | 0.265  | -862.311 |
| 26 | 23 | 310.6 | 109.4 | 0.2061 | 0.6882 | 0.2995 | 0.9951 | 1.9099 | 0.2995 | -891.671 |
| 26 | 24 | 311.3 | 108.7 | 0.2061 | 0.6907 | 0.2983 | 0.9947 | 2.0637 | 0.2983 | -889.053 |
| 26 | 25 | 317.1 | 102.9 | 0.1785 | 0.7546 | 0.2366 | 0.9588 | 1.5359 | 0.2366 | -876.037 |
| 27 | 1  | 311.1 | 108.9 | 0.1415 | 0.4346 | 0.3255 | 0.6523 | 2.8718 | 0.3255 | -818.208 |
| 27 | 2  | 318.6 | 101.4 | 0.1809 | 0.5282 | 0.3426 | 0.7942 | 2.1552 | 0.3426 | -853.243 |
| 27 | 3  | 311.2 | 108.8 | 0.2084 | 0.5028 | 0.4145 | 0.854  | 2.7078 | 0.4145 | -868.066 |
| 27 | 4  | 311.8 | 108.2 | 0.175  | 0.4807 | 0.364  | 0.7611 | 2.0994 | 0.364  | -855.603 |
| 27 | 5  | 316.8 | 103.2 | 0.1941 | 0.5995 | 0.3239 | 0.8812 | 2.0568 | 0.3239 | -868.478 |
| 27 | 6  | 310.4 | 109.6 | 0.1612 | 0.5047 | 0.3195 | 0.7525 | 2.7063 | 0.3195 | -838.838 |
| 27 | 7  | 313.1 | 106.9 | 0.1755 | 0.4902 | 0.358  | 0.7668 | 2.4722 | 0.358  | -851.912 |
| 27 | 8  | 313.4 | 106.6 | 0.2141 | 0.5555 | 0.3854 | 0.9023 | 2.3417 | 0.3854 | -876.965 |
| 27 | 9  | 306.3 | 113.7 | 0.1777 | 0.651  | 0.273  | 0.9177 | 3.3714 | 0.273  | -853.588 |
| 27 | 10 | 318.2 | 101.8 | 0.2055 | 0.5099 | 0.4029 | 0.8376 | 2.0694 | 0.4029 | -872.215 |
| 27 | 11 | 314.4 | 105.6 | 0.1881 | 0.5133 | 0.3665 | 0.8096 | 2.4189 | 0.3665 | -858.075 |
| 27 | 12 | 302.2 | 117.8 | 0.2058 | 0.4056 | 0.5075 | 0.7856 | 3.7023 | 0.5075 | -852.706 |
| 27 | 13 | 321   | 99    | 0.1807 | 0.5606 | 0.3223 | 0.8107 | 1.892  | 0.3223 | -856.928 |
| 27 | 14 | 309.6 | 110.4 | 0.2253 | 0.4502 | 0.5005 | 0.8533 | 2.7596 | 0.5005 | -870.449 |
| 27 | 15 | 309.2 | 110.8 | 0.1789 | 0.6172 | 0.2898 | 0.8835 | 2.6938 | 0.2898 | -858.975 |
| 27 | 16 | 308.8 | 111.2 | 0.1912 | 0.5033 | 0.3799 | 0.8215 | 2.9509 | 0.3799 | -861.384 |
| 27 | 17 | 318.5 | 101.5 | 0.1862 | 0.441  | 0.4221 | 0.7433 | 2.0472 | 0.4221 | -848.934 |
| 27 | 18 | 305.5 | 114.5 | 0.217  | 0.4951 | 0.4383 | 0.8785 | 3.6476 | 0.4383 | -866.972 |
| 27 | 19 | 306.7 | 113.3 | 0.1889 | 0.3458 | 0.5463 | 0.6937 | 3.3592 | 0.5463 | -835.416 |
| 27 | 20 | 317.5 | 102.5 | 0.2184 | 0.5979 | 0.3652 | 0.9329 | 1.6432 | 0.3652 | -893.594 |
| 27 | 21 | 320.5 | 99.5  | 0.1667 | 0.5128 | 0.3251 | 0.7461 | 2.1576 | 0.3251 | -846.71  |
| 27 | 22 | 313   | 107   | 0.1715 | 0.4871 | 0.3522 | 0.7557 | 2.3955 | 0.3522 | -845.962 |
| 27 | 23 | 311.5 | 108.5 | 0.1642 | 0.4307 | 0.3812 | 0.6992 | 2.1609 | 0.3812 | -843.898 |
| 27 | 24 | 314.6 | 105.4 | 0.1852 | 0.4437 | 0.4173 | 0.7501 | 2.0236 | 0.4173 | -857.321 |
| 27 | 25 | 309.1 | 110.9 | 0.154  | 0.4384 | 0.3513 | 0.6874 | 2.6634 | 0.3513 | -831.287 |
| 27 | 26 | 309.9 | 110.1 | 0.2167 | 0.5689 | 0.3809 | 0.9269 | 2.6223 | 0.3809 | -875.853 |
| 28 | 1  | 323   | 97    | 0.1811 | 0.7202 | 0.2515 | 0.917  | 1.5196 | 0.2515 | -866.928 |
| 28 | 2  | 318.5 | 101.5 | 0.2168 | 0.5008 | 0.433  | 0.8565 | 1.908  | 0.433  | -874.104 |
| 28 | 3  | 315.8 | 104.2 | 0.1851 | 0.4005 | 0.462  | 0.7156 | 1.9551 | 0.462  | -849.166 |
| 28 | 4  | 312.5 | 107.5 | 0.1898 | 0.6687 | 0.2838 | 0.937  | 1.9386 | 0.2838 | -876.14  |
| 28 | 5  | 326.6 | 93.4  | 0.1695 | 0.7917 | 0.2141 | 0.9235 | 1.2734 | 0.2141 | -864.122 |
| 28 | 6  | 312.9 | 107.1 | 0.2006 | 0.6006 | 0.3339 | 0.9078 | 2.1406 | 0.3339 | -872.52  |
| 28 | 7  | 316.2 | 103.8 | 0.1904 | 0.5486 | 0.3471 | 0.837  | 1.9549 | 0.3471 | -864.835 |
| 28 | 8  | 317.6 | 102.4 | 0.1877 | 0.5824 | 0.3223 | 0.8519 | 1.8218 | 0.3223 | -864.494 |
| 28 | 9  | 316.4 | 103.6 | 0.2114 | 0.7612 | 0.2777 | 1.0409 | 1.9034 | 0.2777 | -885.313 |
| 28 | 10 | 320.2 | 99.8  | 0.2034 | 0.775  | 0.2625 | 1.0176 | 1.6957 | 0.2625 | -885.178 |
| 28 | 11 | 322.1 | 97.9  | 0.1524 | 0.6428 | 0.2371 | 0.8002 | 1.4589 | 0.2371 | -850.241 |
| 28 | 12 | 315.2 | 104.8 | 0.1968 | 0.6396 | 0.3077 | 0.9219 | 1.7936 | 0.3077 | -880.407 |
| 28 | 13 | 325   | 95    | 0.1741 | 0.6317 | 0.2756 | 0.833  | 1.3818 | 0.2756 | -857.951 |
| 28 | 14 | 315.3 | 104.7 | 0.2067 | 0.5697 | 0.3628 | 0.8916 | 1.8953 | 0.3628 | -873.918 |
| 28 | 15 | 319.3 | 100.7 | 0.1539 | 0.5428 | 0.2836 | 0.7416 | 1.5193 | 0.2836 | -844.59  |
| 28 | 16 | 313.7 | 106.3 | 0.1481 | 0.6681 | 0.2216 | 0.8391 | 2.0728 | 0.2216 | -850.896 |
| 28 | 17 | 318.4 | 101.6 | 0.1785 | 0.7164 | 0.2491 | 0.9258 | 1.8274 | 0.2491 | -862.743 |
| 28 | 18 | 311.3 | 108.7 | 0.1944 | 0.451  | 0.431  | 0.7824 | 2.3662 | 0.431  | -858.005 |
| 28 | 19 | 311.4 | 108.6 | 0.2398 | 0.5802 | 0.4133 | 0.9836 | 2.3597 | 0.4133 | -892.535 |
| 28 | 20 | 319.9 | 100.1 | 0.1736 | 0.7586 | 0.2288 | 0.9388 | 1.3461 | 0.2288 | -874.592 |
| 28 | 21 | 326.5 | 93.5  | 0.1493 | 0.595  | 0.2509 | 0.7454 | 1.4136 | 0.2509 | -840.024 |
| 28 | 22 | 324   | 96    | 0.1582 | 0.4667 | 0.339  | 0.6862 | 1.3321 | 0.339  | -837.873 |
| 28 | 23 | 316.1 | 103.9 | 0.2038 | 0.6361 | 0.3204 | 0.932  | 1.6293 | 0.3204 | -885.964 |
| 28 | 24 | 312.4 | 107.6 | 0.1666 | 0.624  | 0.267  | 0.8514 | 2.1648 | 0.267  | -855.553 |
| 28 | 25 | 317.2 | 102.8 | 0.1559 | 0.7673 | 0.2031 | 0.9168 | 1.698  | 0.2031 | -855.869 |
| 28 | 26 | 316.2 | 103.8 | 0.1443 | 0.6914 | 0.2086 | 0.8386 | 1.7728 | 0.2086 | -844.141 |

|    |    |       |       |        |        |        |        |        |        |          |
|----|----|-------|-------|--------|--------|--------|--------|--------|--------|----------|
| 28 | 27 | 319.1 | 100.9 | 0.1877 | 0.6027 | 0.3114 | 0.8623 | 1.8315 | 0.3114 | -865.543 |
| 29 | 1  | 300.6 | 119.4 | 0.1483 | 0.5636 | 0.2631 | 0.7988 | 4.038  | 0.2631 | -827.644 |
| 29 | 2  | 309.3 | 110.7 | 0.1972 | 0.5024 | 0.3925 | 0.833  | 2.7035 | 0.3925 | -864.67  |
| 29 | 3  | 304.7 | 115.3 | 0.1861 | 0.5186 | 0.3589 | 0.8321 | 3.0208 | 0.3589 | -861.246 |
| 29 | 4  | 303.3 | 116.7 | 0.1648 | 0.6583 | 0.2504 | 0.906  | 2.7309 | 0.2504 | -862.835 |
| 29 | 5  | 313.4 | 106.6 | 0.1514 | 0.5602 | 0.2702 | 0.7655 | 2.0579 | 0.2702 | -844.005 |
| 29 | 6  | 299.7 | 120.3 | 0.1571 | 0.4665 | 0.3367 | 0.737  | 3.7232 | 0.3367 | -831.718 |
| 29 | 7  | 303   | 117   | 0.1581 | 0.5531 | 0.2858 | 0.8043 | 3.3932 | 0.2858 | -842.816 |
| 29 | 8  | 310.4 | 109.6 | 0.1724 | 0.5894 | 0.2925 | 0.8436 | 2.2684 | 0.2925 | -861.453 |
| 29 | 9  | 301.8 | 118.2 | 0.1823 | 0.5982 | 0.3047 | 0.8981 | 3.4565 | 0.3047 | -857.782 |
| 29 | 10 | 311.7 | 108.3 | 0.1581 | 0.51   | 0.3101 | 0.7466 | 2.2725 | 0.3101 | -844.599 |
| 29 | 11 | 298.6 | 121.4 | 0.1922 | 0.566  | 0.3395 | 0.9006 | 4.5049 | 0.3395 | -856.24  |
| 29 | 12 | 295.3 | 124.7 | 0.186  | 0.5967 | 0.3117 | 0.9236 | 4.4105 | 0.3117 | -858.877 |
| 29 | 13 | 313.9 | 106.1 | 0.1796 | 0.6185 | 0.2903 | 0.8714 | 2.0958 | 0.2903 | -864.685 |
| 29 | 14 | 303.2 | 116.8 | 0.224  | 0.5479 | 0.4088 | 0.9423 | 3.0065 | 0.4088 | -881.744 |
| 29 | 15 | 303.4 | 116.6 | 0.157  | 0.6841 | 0.2295 | 0.9099 | 2.8896 | 0.2295 | -856.207 |
| 29 | 16 | 305.6 | 114.4 | 0.1465 | 0.4753 | 0.3083 | 0.7082 | 2.7087 | 0.3083 | -834.772 |
| 29 | 17 | 308.9 | 111.1 | 0.1548 | 0.6709 | 0.2307 | 0.8737 | 2.5661 | 0.2307 | -850.959 |
| 29 | 18 | 301   | 119   | 0.185  | 0.4311 | 0.4291 | 0.7642 | 3.6536 | 0.4291 | -851.013 |
| 29 | 19 | 300.5 | 119.5 | 0.2017 | 0.4725 | 0.427  | 0.8362 | 3.7334 | 0.427  | -859.779 |
| 29 | 20 | 304.2 | 115.8 | 0.2039 | 0.7176 | 0.2841 | 1.0366 | 2.58   | 0.2841 | -889.549 |
| 29 | 21 | 309.9 | 110.1 | 0.1395 | 0.6409 | 0.2177 | 0.8128 | 2.9128 | 0.2177 | -835.857 |
| 29 | 22 | 305.4 | 114.6 | 0.1797 | 0.5692 | 0.3158 | 0.8579 | 2.8118 | 0.3158 | -860.076 |
| 29 | 23 | 300.7 | 119.3 | 0.2    | 0.5219 | 0.3833 | 0.8744 | 3.1465 | 0.3833 | -871.566 |
| 29 | 24 | 307.6 | 112.4 | 0.1628 | 0.4223 | 0.3854 | 0.6968 | 2.4289 | 0.3854 | -840.401 |
| 29 | 25 | 306.7 | 113.3 | 0.1459 | 0.5057 | 0.2886 | 0.7289 | 2.4765 | 0.2886 | -838.579 |
| 29 | 26 | 304.3 | 115.7 | 0.2085 | 0.6664 | 0.3129 | 1.0039 | 2.8114 | 0.3129 | -884.957 |
| 29 | 27 | 305.8 | 114.2 | 0.1632 | 0.5966 | 0.2736 | 0.8432 | 3.2156 | 0.2736 | -848.35  |
| 29 | 28 | 309.6 | 110.4 | 0.1976 | 0.694  | 0.2848 | 0.9845 | 2.43   | 0.2848 | -881.448 |
| 30 | 1  | 309.4 | 110.6 | 0.2021 | 0.5738 | 0.3522 | 0.8998 | 2.719  | 0.3522 | -867.678 |
| 30 | 2  | 313.9 | 106.1 | 0.2235 | 0.4353 | 0.5135 | 0.831  | 2.3014 | 0.5135 | -871.639 |
| 30 | 3  | 309.7 | 110.3 | 0.1804 | 0.4912 | 0.3672 | 0.786  | 2.5772 | 0.3672 | -854.22  |
| 30 | 4  | 306   | 114   | 0.2055 | 0.5215 | 0.3941 | 0.8738 | 2.5765 | 0.3941 | -875.663 |
| 30 | 5  | 320.9 | 99.1  | 0.1805 | 0.6033 | 0.2991 | 0.8407 | 1.5765 | 0.2991 | -864.033 |
| 30 | 6  | 308.4 | 111.6 | 0.1982 | 0.494  | 0.4013 | 0.8304 | 2.6441 | 0.4013 | -862.87  |
| 30 | 7  | 311.2 | 108.8 | 0.1881 | 0.405  | 0.4645 | 0.733  | 2.3816 | 0.4645 | -852.082 |
| 30 | 8  | 315.1 | 104.9 | 0.1666 | 0.6149 | 0.271  | 0.8359 | 1.9518 | 0.271  | -855.84  |
| 30 | 9  | 309.8 | 110.2 | 0.1996 | 0.6996 | 0.2853 | 0.9922 | 2.5143 | 0.2853 | -875.791 |
| 30 | 10 | 311.6 | 108.4 | 0.1886 | 0.452  | 0.4173 | 0.7698 | 2.4759 | 0.4173 | -854.108 |
| 30 | 11 | 315.3 | 104.7 | 0.1879 | 0.5989 | 0.3137 | 0.8711 | 1.9737 | 0.3137 | -873.473 |
| 30 | 12 | 304.2 | 115.8 | 0.212  | 0.5458 | 0.3884 | 0.9122 | 2.9859 | 0.3884 | -875.655 |
| 30 | 13 | 316.8 | 103.2 | 0.2023 | 0.511  | 0.3959 | 0.8347 | 2.0084 | 0.3959 | -868.066 |
| 30 | 14 | 306.5 | 113.5 | 0.2022 | 0.4689 | 0.4312 | 0.8228 | 2.8    | 0.4312 | -859.093 |
| 30 | 15 | 306.4 | 113.6 | 0.1668 | 0.5486 | 0.3041 | 0.8103 | 2.757  | 0.3041 | -850.25  |
| 30 | 16 | 306.4 | 113.6 | 0.1859 | 0.5579 | 0.3333 | 0.8596 | 2.8263 | 0.3333 | -863.993 |
| 30 | 17 | 321.2 | 98.8  | 0.149  | 0.6076 | 0.2452 | 0.7705 | 1.5739 | 0.2452 | -841.97  |
| 30 | 18 | 302.7 | 117.3 | 0.2355 | 0.3687 | 0.6388 | 0.8182 | 3.4941 | 0.6388 | -868.114 |
| 30 | 19 | 308.4 | 111.6 | 0.224  | 0.4675 | 0.4791 | 0.8661 | 2.6309 | 0.4791 | -876.524 |
| 30 | 20 | 314.5 | 105.5 | 0.204  | 0.4693 | 0.4348 | 0.8119 | 1.6948 | 0.4348 | -875.006 |
| 30 | 21 | 320.3 | 99.7  | 0.1804 | 0.5438 | 0.3318 | 0.8001 | 1.8754 | 0.3318 | -860.854 |
| 30 | 22 | 307.2 | 112.8 | 0.1991 | 0.3956 | 0.5032 | 0.7555 | 2.8322 | 0.5032 | -849.064 |
| 30 | 23 | 311.9 | 108.1 | 0.2079 | 0.4365 | 0.4762 | 0.8002 | 1.8923 | 0.4762 | -872.968 |
| 30 | 24 | 306.6 | 113.4 | 0.181  | 0.4923 | 0.3676 | 0.7951 | 2.7051 | 0.3676 | -854.173 |
| 30 | 25 | 310.2 | 109.8 | 0.194  | 0.5023 | 0.3862 | 0.8237 | 2.3104 | 0.3862 | -865.251 |
| 30 | 26 | 313.7 | 106.3 | 0.157  | 0.5323 | 0.2948 | 0.7559 | 1.9367 | 0.2948 | -848.359 |
| 30 | 27 | 309   | 111   | 0.2133 | 0.4711 | 0.4527 | 0.8441 | 2.9427 | 0.4527 | -864.854 |
| 30 | 28 | 309.5 | 110.5 | 0.1485 | 0.5348 | 0.2777 | 0.7503 | 2.6044 | 0.2777 | -832.195 |
| 30 | 29 | 303.9 | 116.1 | 0.1794 | 0.6218 | 0.2885 | 0.9051 | 3.0724 | 0.2885 | -862.743 |
| 31 | 1  | 312.5 | 107.5 | 0.2459 | 0.4544 | 0.5411 | 0.8977 | 2.2589 | 0.5411 | -882.256 |
| 31 | 2  | 313.2 | 106.8 | 0.2218 | 0.4452 | 0.4982 | 0.8357 | 2.3308 | 0.4982 | -871.29  |
| 31 | 3  | 307.3 | 112.7 | 0.2192 | 0.4772 | 0.4594 | 0.8655 | 2.7496 | 0.4594 | -873.719 |
| 31 | 4  | 306.2 | 113.8 | 0.24   | 0.5852 | 0.4101 | 1.0006 | 2.3596 | 0.4101 | -900.475 |
| 31 | 5  | 317.7 | 102.3 | 0.2325 | 0.6952 | 0.3345 | 1.0356 | 1.7284 | 0.3345 | -897.238 |
| 31 | 6  | 310.9 | 109.1 | 0.2107 | 0.4996 | 0.4217 | 0.8572 | 2.1482 | 0.4217 | -874.454 |

|    |    |       |       |        |        |        |        |        |        |          |
|----|----|-------|-------|--------|--------|--------|--------|--------|--------|----------|
| 31 | 7  | 308.8 | 111.2 | 0.2229 | 0.4424 | 0.5039 | 0.843  | 2.5715 | 0.5039 | -873.046 |
| 31 | 8  | 315.9 | 104.1 | 0.2422 | 0.528  | 0.4588 | 0.9392 | 1.8002 | 0.4588 | -893.992 |
| 31 | 9  | 308.8 | 111.2 | 0.26   | 0.5383 | 0.4829 | 1.001  | 2.5015 | 0.4829 | -897.821 |
| 31 | 10 | 312.6 | 107.4 | 0.2403 | 0.5129 | 0.4684 | 0.93   | 2.2598 | 0.4684 | -888.014 |
| 31 | 11 | 310   | 110   | 0.2557 | 0.5424 | 0.4714 | 0.9924 | 2.4568 | 0.4714 | -897.992 |
| 31 | 12 | 310.4 | 109.6 | 0.249  | 0.4555 | 0.5466 | 0.9085 | 2.021  | 0.5466 | -894.379 |
| 31 | 13 | 314.6 | 105.4 | 0.21   | 0.5043 | 0.4164 | 0.8515 | 2.1602 | 0.4164 | -872.985 |
| 31 | 14 | 318.9 | 101.1 | 0.0156 | 0.0556 | 0.2805 | 0.0757 | 1.4301 | 0.2805 | -623.707 |
| 31 | 15 | 310.8 | 109.2 | 0.2109 | 0.6604 | 0.3193 | 0.9831 | 2.0473 | 0.3193 | -887.266 |
| 31 | 16 | 306.2 | 113.8 | 0.2367 | 0.4629 | 0.5115 | 0.894  | 2.7211 | 0.5115 | -884.503 |
| 31 | 17 | 315   | 105   | 0.2226 | 0.5068 | 0.4393 | 0.881  | 2.008  | 0.4393 | -876.214 |
| 31 | 18 | 299.9 | 120.1 | 0.2568 | 0.3928 | 0.6538 | 0.8871 | 3.9941 | 0.6538 | -875.939 |
| 31 | 19 | 308.2 | 111.8 | 0.32   | 0.4198 | 0.7622 | 1.0396 | 2.5236 | 0.7622 | -915.394 |
| 31 | 20 | 312.8 | 107.2 | 0.2118 | 0.4093 | 0.5175 | 0.7866 | 1.7096 | 0.5175 | -871.837 |
| 31 | 21 | 323.4 | 96.6  | 0.2272 | 0.5719 | 0.3972 | 0.9194 | 1.547  | 0.3972 | -889.327 |
| 31 | 22 | 310.9 | 109.1 | 0.1737 | 0.4421 | 0.3929 | 0.7303 | 2.2393 | 0.3929 | -845.351 |
| 31 | 23 | 312.7 | 107.3 | 0.2338 | 0.5253 | 0.445  | 0.9247 | 1.7019 | 0.445  | -895.206 |
| 31 | 24 | 302.5 | 117.5 | 0.2078 | 0.4548 | 0.4569 | 0.8307 | 3.1531 | 0.4569 | -866.192 |
| 31 | 25 | 306.8 | 113.2 | 0.2342 | 0.5059 | 0.4629 | 0.9222 | 2.5308 | 0.4629 | -884.535 |
| 31 | 26 | 314.7 | 105.3 | 0.1981 | 0.7046 | 0.2811 | 0.975  | 1.7092 | 0.2811 | -882.191 |
| 31 | 27 | 312.8 | 107.2 | 0.2337 | 0.4842 | 0.4826 | 0.8929 | 2.3419 | 0.4826 | -882.742 |
| 31 | 28 | 317.7 | 102.3 | 0.2114 | 0.5621 | 0.3761 | 0.8905 | 1.6847 | 0.3761 | -879.088 |
| 31 | 29 | 305.7 | 114.3 | 0.2386 | 0.5764 | 0.4138 | 0.9916 | 2.6435 | 0.4138 | -895.371 |
| 31 | 30 | 308.1 | 111.9 | 0.2117 | 0.4623 | 0.4579 | 0.8352 | 2.5496 | 0.4579 | -866.838 |
| 32 | 1  | 319.7 | 100.3 | 0.1815 | 0.5745 | 0.3159 | 0.826  | 1.912  | 0.3159 | -858.329 |
| 32 | 2  | 318.5 | 101.5 | 0.1892 | 0.458  | 0.4132 | 0.7625 | 2.2491 | 0.4132 | -850.556 |
| 32 | 3  | 313.7 | 106.3 | 0.2155 | 0.4645 | 0.4641 | 0.8356 | 2.3929 | 0.4641 | -869.686 |
| 32 | 4  | 312.5 | 107.5 | 0.213  | 0.6342 | 0.3358 | 0.9624 | 2.0512 | 0.3358 | -888.939 |
| 32 | 5  | 318.2 | 101.8 | 0.2046 | 0.6139 | 0.3332 | 0.9114 | 1.9445 | 0.3332 | -874.638 |
| 32 | 6  | 313.8 | 106.2 | 0.1907 | 0.5023 | 0.3797 | 0.8086 | 2.3019 | 0.3797 | -855.566 |
| 32 | 7  | 315.7 | 104.3 | 0.1897 | 0.4217 | 0.4498 | 0.7419 | 2.2064 | 0.4498 | -854.327 |
| 32 | 8  | 317.6 | 102.4 | 0.2026 | 0.6002 | 0.3376 | 0.8988 | 1.9554 | 0.3376 | -876.499 |
| 32 | 9  | 312.2 | 107.8 | 0.19   | 0.5025 | 0.3781 | 0.8105 | 2.5249 | 0.3781 | -856.262 |
| 32 | 10 | 317   | 103   | 0.2015 | 0.4528 | 0.4451 | 0.7894 | 2.2318 | 0.4451 | -859.229 |
| 32 | 11 | 317.4 | 102.6 | 0.1973 | 0.4632 | 0.426  | 0.7869 | 2.0977 | 0.426  | -858.622 |
| 32 | 12 | 312.2 | 107.8 | 0.1958 | 0.6734 | 0.2908 | 0.9554 | 2.198  | 0.2908 | -877.089 |
| 32 | 13 | 326   | 94    | 0.1722 | 0.4721 | 0.3648 | 0.7181 | 1.4959 | 0.3648 | -842.593 |
| 32 | 14 | 312.2 | 107.8 | 0.2158 | 0.425  | 0.5077 | 0.8084 | 2.4355 | 0.5077 | -862.396 |
| 32 | 15 | 317.7 | 102.3 | 0.1878 | 0.5844 | 0.3214 | 0.8531 | 1.7607 | 0.3214 | -867.211 |
| 32 | 16 | 308.7 | 111.3 | 0.2065 | 0.3417 | 0.6042 | 0.7269 | 3.0432 | 0.6042 | -850.881 |
| 32 | 17 | 324.1 | 95.9  | 0.1769 | 0.5222 | 0.3388 | 0.7674 | 1.5399 | 0.3388 | -850.594 |
| 32 | 18 | 310.6 | 109.4 | 0.2571 | 0.3195 | 0.8045 | 0.82   | 2.8522 | 0.8045 | -876.071 |
| 32 | 19 | 309.8 | 110.2 | 0.2389 | 0.4603 | 0.5191 | 0.8911 | 2.8739 | 0.5191 | -877.963 |
| 32 | 20 | 319.3 | 100.7 | 0.1836 | 0.5318 | 0.3452 | 0.8013 | 1.5258 | 0.3452 | -864.127 |
| 32 | 21 | 325.5 | 94.5  | 0.2037 | 0.4431 | 0.4598 | 0.7728 | 1.6947 | 0.4598 | -861.519 |
| 32 | 22 | 315.1 | 104.9 | 0.1857 | 0.4433 | 0.419  | 0.7502 | 2.1936 | 0.419  | -851.929 |
| 32 | 23 | 314.3 | 105.7 | 0.1968 | 0.5352 | 0.3676 | 0.8459 | 1.9082 | 0.3676 | -872.624 |
| 32 | 24 | 310.4 | 109.6 | 0.1943 | 0.4265 | 0.4556 | 0.7646 | 2.5327 | 0.4556 | -852.095 |
| 32 | 25 | 316.1 | 103.9 | 0.2051 | 0.5014 | 0.4089 | 0.8352 | 1.8766 | 0.4089 | -870.153 |
| 32 | 26 | 317.9 | 102.1 | 0.2328 | 0.5577 | 0.4175 | 0.9355 | 1.7543 | 0.4175 | -890.951 |
| 32 | 27 | 318.8 | 101.2 | 0.213  | 0.5563 | 0.3829 | 0.8871 | 2.1397 | 0.3829 | -877.268 |
| 32 | 28 | 326.9 | 93.1  | 0.1667 | 0.7165 | 0.2326 | 0.8656 | 1.2593 | 0.2326 | -861.14  |
| 32 | 29 | 308.4 | 111.6 | 0.2205 | 0.4441 | 0.4965 | 0.8397 | 2.817  | 0.4965 | -871.308 |
| 32 | 30 | 315.9 | 104.1 | 0.1843 | 0.4915 | 0.375  | 0.7814 | 2.1437 | 0.375  | -857.647 |
| 32 | 31 | 316.3 | 103.7 | 0.2216 | 0.4304 | 0.5149 | 0.8195 | 1.9866 | 0.5149 | -871.067 |
| 33 | 1  | 311   | 109   | 0.1722 | 0.4968 | 0.3467 | 0.7693 | 2.3466 | 0.3467 | -850.183 |
| 33 | 2  | 309.2 | 110.8 | 0.1764 | 0.5088 | 0.3468 | 0.7924 | 2.7349 | 0.3468 | -851.328 |
| 33 | 3  | 308.4 | 111.6 | 0.1899 | 0.5013 | 0.3789 | 0.8181 | 2.5636 | 0.3789 | -864.422 |
| 33 | 4  | 302.4 | 117.6 | 0.1673 | 0.6956 | 0.2405 | 0.9455 | 2.9491 | 0.2405 | -863.398 |
| 33 | 5  | 312.1 | 107.9 | 0.1781 | 0.7682 | 0.2318 | 0.9891 | 2.1942 | 0.2318 | -871.789 |
| 33 | 6  | 309.6 | 110.4 | 0.1398 | 0.5546 | 0.252  | 0.7465 | 2.3115 | 0.252  | -831.743 |
| 33 | 7  | 305.7 | 114.3 | 0.149  | 0.5795 | 0.2571 | 0.7985 | 2.984  | 0.2571 | -842.445 |
| 33 | 8  | 312.8 | 107.2 | 0.1803 | 0.5125 | 0.3518 | 0.7953 | 2.0635 | 0.3518 | -861.391 |
| 33 | 9  | 306.8 | 113.2 | 0.1735 | 0.6424 | 0.2701 | 0.8997 | 2.8102 | 0.2701 | -858.73  |



|    |    |       |       |        |        |        |        |        |        |          |
|----|----|-------|-------|--------|--------|--------|--------|--------|--------|----------|
| 33 | 10 | 310.9 | 109.1 | 0.145  | 0.5169 | 0.2806 | 0.7248 | 2.3795 | 0.2806 | -832.539 |
| 33 | 11 | 309.3 | 110.7 | 0.1784 | 0.5258 | 0.3392 | 0.8098 | 2.4348 | 0.3392 | -857.188 |
| 33 | 12 | 302.3 | 117.7 | 0.1962 | 0.4521 | 0.4339 | 0.8037 | 3.1236 | 0.4339 | -860.303 |
| 33 | 13 | 316.4 | 103.6 | 0.1457 | 0.5584 | 0.261  | 0.7425 | 1.8646 | 0.261  | -835.842 |
| 33 | 14 | 307.1 | 112.9 | 0.2474 | 0.47   | 0.5263 | 0.9216 | 2.5265 | 0.5263 | -889.34  |
| 33 | 15 | 309.6 | 110.4 | 0.1785 | 0.5364 | 0.3328 | 0.818  | 2.1803 | 0.3328 | -863.193 |
| 33 | 16 | 307.6 | 112.4 | 0.1826 | 0.4263 | 0.4284 | 0.7435 | 2.4936 | 0.4284 | -852.918 |
| 33 | 17 | 312.5 | 107.5 | 0.1319 | 0.5764 | 0.2288 | 0.7369 | 2.2073 | 0.2288 | -829.376 |
| 33 | 18 | 299.6 | 120.4 | 0.1507 | 0.4595 | 0.328  | 0.7177 | 3.9692 | 0.328  | -829.106 |
| 33 | 19 | 305.5 | 114.5 | 0.212  | 0.5248 | 0.4039 | 0.8917 | 2.864  | 0.4039 | -874.171 |
| 33 | 20 | 310.4 | 109.6 | 0.1675 | 0.6478 | 0.2586 | 0.8786 | 1.9111 | 0.2586 | -864.431 |
| 33 | 21 | 310.5 | 109.5 | 0.145  | 0.5181 | 0.2798 | 0.7269 | 2.8054 | 0.2798 | -829.993 |
| 33 | 22 | 313.2 | 106.8 | 0.1603 | 0.4459 | 0.3595 | 0.6989 | 1.9756 | 0.3595 | -841.289 |
| 33 | 23 | 306.7 | 113.3 | 0.1849 | 0.5043 | 0.3666 | 0.8132 | 2.3208 | 0.3666 | -866.741 |
| 33 | 24 | 309.9 | 110.1 | 0.1289 | 0.5777 | 0.2231 | 0.7397 | 2.1802 | 0.2231 | -830.077 |
| 33 | 25 | 303   | 117   | 0.146  | 0.5754 | 0.2538 | 0.7968 | 3.1284 | 0.2538 | -836.13  |
| 33 | 26 | 310.3 | 109.7 | 0.199  | 0.7122 | 0.2794 | 0.999  | 2.1238 | 0.2794 | -886.7   |
| 33 | 27 | 308.4 | 111.6 | 0.1968 | 0.5228 | 0.3765 | 0.8504 | 2.8123 | 0.3765 | -865.192 |
| 33 | 28 | 313.5 | 106.5 | 0.1893 | 0.6113 | 0.3096 | 0.889  | 1.9976 | 0.3096 | -870.222 |
| 33 | 29 | 304.3 | 115.7 | 0.154  | 0.5633 | 0.2733 | 0.8002 | 2.8027 | 0.2733 | -848.368 |
| 33 | 30 | 307.7 | 112.3 | 0.1842 | 0.5933 | 0.3104 | 0.8808 | 2.5999 | 0.3104 | -868.406 |
| 33 | 31 | 308.5 | 111.5 | 0.2574 | 0.4624 | 0.5567 | 0.9355 | 2.3179 | 0.5567 | -896.932 |
| 33 | 32 | 312.2 | 107.8 | 0.1995 | 0.5626 | 0.3545 | 0.878  | 2.3119 | 0.3545 | -873.093 |
| 34 | 1  | 308.8 | 111.2 | 0.2022 | 0.6396 | 0.3161 | 0.9538 | 2.6834 | 0.3161 | -873.248 |
| 34 | 2  | 314.1 | 105.9 | 0.2263 | 0.5018 | 0.451  | 0.8873 | 2.1044 | 0.451  | -886.447 |
| 34 | 3  | 307.1 | 112.9 | 0.2181 | 0.539  | 0.4046 | 0.9131 | 2.6666 | 0.4046 | -881.783 |
| 34 | 4  | 305   | 115   | 0.2208 | 0.6732 | 0.3279 | 1.034  | 2.5203 | 0.3279 | -896.055 |
| 34 | 5  | 312   | 108   | 0.2269 | 0.6407 | 0.3542 | 1.0001 | 2.2083 | 0.3542 | -891.415 |
| 34 | 6  | 307.8 | 112.2 | 0.1911 | 0.6314 | 0.3026 | 0.9262 | 2.3474 | 0.3026 | -874.065 |
| 34 | 7  | 314.1 | 105.9 | 0.2    | 0.4985 | 0.4011 | 0.8257 | 1.9144 | 0.4011 | -874.091 |
| 34 | 8  | 311.4 | 108.6 | 0.2059 | 0.5638 | 0.3652 | 0.8954 | 2.1886 | 0.3652 | -879.916 |
| 34 | 9  | 309.7 | 110.3 | 0.2101 | 0.6905 | 0.3043 | 1.0087 | 2.3112 | 0.3043 | -885.834 |
| 34 | 10 | 313.5 | 106.5 | 0.2024 | 0.5704 | 0.3549 | 0.8872 | 2.0884 | 0.3549 | -875.431 |
| 34 | 11 | 306.6 | 113.4 | 0.217  | 0.6305 | 0.3442 | 0.986  | 2.8406 | 0.3442 | -884.07  |
| 34 | 12 | 308.5 | 111.5 | 0.232  | 0.6502 | 0.3568 | 1.0291 | 2.1618 | 0.3568 | -902.502 |
| 34 | 13 | 316.2 | 103.8 | 0.1771 | 0.6113 | 0.2897 | 0.8532 | 1.8597 | 0.2897 | -862.537 |
| 34 | 14 | 306.8 | 113.2 | 0.2528 | 0.5086 | 0.4971 | 0.9652 | 2.501  | 0.4971 | -896.205 |
| 34 | 15 | 304.9 | 115.1 | 0.1829 | 0.5967 | 0.3066 | 0.8888 | 2.6785 | 0.3066 | -870.147 |
| 34 | 16 | 307.1 | 112.9 | 0.21   | 0.5655 | 0.3714 | 0.9166 | 2.534  | 0.3714 | -881.484 |
| 34 | 17 | 309.7 | 110.3 | 0.1826 | 0.9613 | 0.1899 | 1.161  | 2.4433 | 0.1899 | -880.18  |
| 34 | 18 | 301.9 | 118.1 | 0.213  | 0.5029 | 0.4234 | 0.8835 | 3.5192 | 0.4234 | -870.378 |
| 34 | 19 | 310.5 | 109.5 | 0.2662 | 0.5674 | 0.4692 | 1.0342 | 2.1858 | 0.4692 | -910.854 |
| 34 | 20 | 305.4 | 114.6 | 0.2055 | 0.7044 | 0.2917 | 1.025  | 2.4329 | 0.2917 | -889.305 |
| 34 | 21 | 316.5 | 103.5 | 0.1642 | 0.7179 | 0.2287 | 0.902  | 2.0705 | 0.2287 | -860.602 |
| 34 | 22 | 311.5 | 108.5 | 0.2019 | 0.5774 | 0.3497 | 0.8967 | 2.0857 | 0.3497 | -878.285 |
| 34 | 23 | 306   | 114   | 0.2079 | 0.5392 | 0.3856 | 0.8935 | 2.3877 | 0.3856 | -882.749 |
| 34 | 24 | 306.7 | 113.3 | 0.207  | 0.5456 | 0.3795 | 0.895  | 2.5725 | 0.3795 | -877.882 |
| 34 | 25 | 306.5 | 113.5 | 0.1915 | 0.5641 | 0.3394 | 0.8765 | 2.5095 | 0.3394 | -870.269 |
| 34 | 26 | 309.2 | 110.8 | 0.2199 | 0.6711 | 0.3277 | 1.0169 | 2.178  | 0.3277 | -896.81  |
| 34 | 27 | 313.3 | 106.7 | 0.2518 | 0.6935 | 0.363  | 1.0919 | 2.1604 | 0.363  | -912.103 |
| 34 | 28 | 310.4 | 109.6 | 0.2096 | 0.6057 | 0.3461 | 0.9391 | 2.3511 | 0.3461 | -880.612 |
| 34 | 29 | 305.9 | 114.1 | 0.1953 | 0.5157 | 0.3787 | 0.8469 | 2.6267 | 0.3787 | -869.072 |
| 34 | 30 | 307.1 | 112.9 | 0.1997 | 0.5768 | 0.3463 | 0.9031 | 2.628  | 0.3463 | -875.441 |
| 34 | 31 | 308   | 112   | 0.2615 | 0.5472 | 0.478  | 1.0132 | 2.3681 | 0.478  | -905.488 |
| 34 | 32 | 312.8 | 107.2 | 0.2456 | 0.6071 | 0.4046 | 1.0137 | 2.232  | 0.4046 | -897.441 |
| 34 | 33 | 310.5 | 109.5 | 0.17   | 0.6285 | 0.2705 | 0.8685 | 2.0102 | 0.2705 | -866.453 |
| 35 | 1  | 310.2 | 109.8 | 0.194  | 0.5346 | 0.3629 | 0.8491 | 2.8156 | 0.3629 | -857.047 |
| 35 | 2  | 313.2 | 106.8 | 0.2049 | 0.5245 | 0.3906 | 0.8584 | 2.6982 | 0.3906 | -863.775 |
| 35 | 3  | 304.6 | 115.4 | 0.1638 | 0.3989 | 0.4107 | 0.6854 | 3.8058 | 0.4107 | -824.308 |
| 35 | 4  | 306.9 | 113.1 | 0.1909 | 0.5326 | 0.3585 | 0.8488 | 2.6512 | 0.3585 | -864.958 |
| 35 | 5  | 316.1 | 103.9 | 0.1821 | 0.6432 | 0.2831 | 0.8886 | 2.0537 | 0.2831 | -861.632 |
| 35 | 6  | 311.7 | 108.3 | 0.1623 | 0.4682 | 0.3467 | 0.7237 | 2.512  | 0.3467 | -838.467 |
| 35 | 7  | 310.6 | 109.4 | 0.1632 | 0.4819 | 0.3387 | 0.7385 | 2.6847 | 0.3387 | -839.4   |
| 35 | 8  | 313.3 | 106.7 | 0.1635 | 0.658  | 0.2485 | 0.8675 | 2.2826 | 0.2485 | -851.6   |

|    |    |       |       |        |        |        |        |        |        |          |
|----|----|-------|-------|--------|--------|--------|--------|--------|--------|----------|
| 35 | 9  | 307.6 | 112.4 | 0.1954 | 0.4808 | 0.4063 | 0.8153 | 3.1236 | 0.4063 | -853.858 |
| 35 | 10 | 317.6 | 102.4 | 0.1696 | 0.4901 | 0.346  | 0.7432 | 2.0038 | 0.346  | -845.455 |
| 35 | 11 | 309.7 | 110.3 | 0.1847 | 0.451  | 0.4095 | 0.7639 | 2.9216 | 0.4095 | -848.198 |
| 35 | 12 | 306.5 | 113.5 | 0.2122 | 0.5046 | 0.4206 | 0.8737 | 2.8982 | 0.4206 | -871.707 |
| 35 | 13 | 315.4 | 104.6 | 0.1467 | 0.5706 | 0.2571 | 0.7567 | 2.406  | 0.2571 | -830.628 |
| 35 | 14 | 306.9 | 113.1 | 0.2377 | 0.5611 | 0.4237 | 0.9744 | 3.0589 | 0.4237 | -884.026 |
| 35 | 15 | 311.7 | 108.3 | 0.1965 | 0.7046 | 0.2788 | 0.9824 | 2.2896 | 0.2788 | -879.323 |
| 35 | 16 | 310.5 | 109.5 | 0.1336 | 0.49   | 0.2727 | 0.6798 | 2.5599 | 0.2727 | -823.801 |
| 35 | 17 | 313.6 | 106.4 | 0.1649 | 0.6709 | 0.2459 | 0.8792 | 2.5277 | 0.2459 | -848.149 |
| 35 | 18 | 302.6 | 117.4 | 0.2057 | 0.3823 | 0.5379 | 0.7651 | 4.092  | 0.5379 | -847.456 |
| 35 | 19 | 307.7 | 112.3 | 0.2212 | 0.5233 | 0.4226 | 0.9058 | 3.0072 | 0.4226 | -872.558 |
| 35 | 20 | 313.1 | 106.9 | 0.2029 | 0.6315 | 0.3213 | 0.9361 | 2.0014 | 0.3213 | -882.123 |
| 35 | 21 | 322.3 | 97.7  | 0.1504 | 0.5212 | 0.2886 | 0.71   | 1.8123 | 0.2886 | -833.8   |
| 35 | 22 | 312.4 | 107.6 | 0.1692 | 0.4522 | 0.3742 | 0.7252 | 2.4054 | 0.3742 | -840.179 |
| 35 | 23 | 307.7 | 112.3 | 0.2284 | 0.5044 | 0.4529 | 0.9067 | 2.5481 | 0.4529 | -885.194 |
| 35 | 24 | 307.1 | 112.9 | 0.1693 | 0.5087 | 0.3329 | 0.7817 | 2.8513 | 0.3329 | -846.691 |
| 35 | 25 | 309.6 | 110.4 | 0.1666 | 0.5699 | 0.2924 | 0.818  | 2.5485 | 0.2924 | -846.663 |
| 35 | 26 | 311.5 | 108.5 | 0.1765 | 0.7785 | 0.2268 | 0.996  | 2.3435 | 0.2268 | -869.353 |
| 35 | 27 | 311.4 | 108.6 | 0.1981 | 0.5672 | 0.3493 | 0.8807 | 2.9151 | 0.3493 | -862.278 |
| 35 | 28 | 311.9 | 108.1 | 0.148  | 0.6223 | 0.2378 | 0.8101 | 2.4855 | 0.2378 | -837.243 |
| 35 | 29 | 306   | 114   | 0.1582 | 0.5997 | 0.2638 | 0.8342 | 2.9884 | 0.2638 | -847.316 |
| 35 | 30 | 310.9 | 109.1 | 0.1659 | 0.4963 | 0.3344 | 0.7553 | 2.5769 | 0.3344 | -843.257 |
| 35 | 31 | 306.8 | 113.2 | 0.2304 | 0.549  | 0.4196 | 0.9488 | 3.045  | 0.4196 | -881.136 |
| 35 | 32 | 315.2 | 104.8 | 0.2456 | 0.5031 | 0.4882 | 0.9298 | 2.4178 | 0.4882 | -888.422 |
| 35 | 33 | 309.6 | 110.4 | 0.1744 | 0.5096 | 0.3422 | 0.7874 | 2.5388 | 0.3422 | -849.962 |
| 35 | 34 | 309   | 111   | 0.2031 | 0.6194 | 0.3279 | 0.9394 | 2.5339 | 0.3279 | -879.287 |
| 36 | 1  | 314.6 | 105.4 | 0.1686 | 0.6512 | 0.2589 | 0.8692 | 2.1017 | 0.2589 | -858.439 |
| 36 | 2  | 315.3 | 104.7 | 0.1989 | 0.4628 | 0.4299 | 0.7941 | 2.0811 | 0.4299 | -862.517 |
| 36 | 3  | 311.6 | 108.4 | 0.2038 | 0.6102 | 0.334  | 0.926  | 2.3246 | 0.334  | -876.401 |
| 36 | 4  | 311.7 | 108.3 | 0.1878 | 0.6565 | 0.2861 | 0.926  | 1.9682 | 0.2861 | -877.907 |
| 36 | 5  | 319.3 | 100.7 | 0.1746 | 0.7155 | 0.244  | 0.9129 | 1.7178 | 0.244  | -863.415 |
| 36 | 6  | 311.9 | 108.1 | 0.1712 | 0.5972 | 0.2867 | 0.8424 | 2.2062 | 0.2867 | -855.126 |
| 36 | 7  | 309.9 | 110.1 | 0.168  | 0.469  | 0.3582 | 0.7407 | 2.5328 | 0.3582 | -844.23  |
| 36 | 8  | 287.7 | 132.3 | 0.0108 | 0.0235 | 0.4583 | 0.0443 | 8.1142 | 0.4583 | -602.05  |
| 36 | 9  | 310.6 | 109.4 | 0.1793 | 0.656  | 0.2734 | 0.9103 | 2.4406 | 0.2734 | -857.951 |

|    |    |       |       |        |        |        |        |        |        |          |
|----|----|-------|-------|--------|--------|--------|--------|--------|--------|----------|
| 36 | 10 | 319.8 | 100.2 | 0.1657 | 0.5271 | 0.3143 | 0.7558 | 1.643  | 0.3143 | -851.984 |
| 36 | 11 | 312.3 | 107.7 | 0.192  | 0.5361 | 0.3582 | 0.8409 | 2.2369 | 0.3582 | -866.175 |
| 36 | 12 | 310.5 | 109.5 | 0.196  | 0.4962 | 0.395  | 0.8227 | 2.2161 | 0.395  | -865.682 |
| 36 | 13 | 322.3 | 97.7  | 0.1832 | 0.5521 | 0.3319 | 0.807  | 1.4968 | 0.3319 | -862.311 |
| 36 | 14 | 313.5 | 106.5 | 0.2408 | 0.531  | 0.4535 | 0.9432 | 1.9811 | 0.4535 | -891.275 |
| 36 | 15 | 313.1 | 106.9 | 0.2101 | 0.5011 | 0.4193 | 0.8525 | 1.9973 | 0.4193 | -875.046 |
| 36 | 16 | 313.7 | 106.3 | 0.1737 | 0.5768 | 0.3012 | 0.8272 | 1.9619 | 0.3012 | -863.616 |
| 36 | 17 | 316.7 | 103.3 | 0.1529 | 0.7237 | 0.2113 | 0.8801 | 1.9224 | 0.2113 | -849.892 |
| 36 | 18 | 309.7 | 110.3 | 0.1997 | 0.4819 | 0.4143 | 0.8213 | 2.3907 | 0.4143 | -866.066 |
| 36 | 19 | 308.1 | 111.9 | 0.2338 | 0.4675 | 0.5001 | 0.8883 | 2.6419 | 0.5001 | -879.887 |
| 36 | 20 | 316.3 | 103.7 | 0.2011 | 0.6962 | 0.2889 | 0.9701 | 1.5605 | 0.2889 | -890.841 |
| 36 | 21 | 318   | 102   | 0.1584 | 0.6563 | 0.2413 | 0.838  | 2.0243 | 0.2413 | -851.913 |
| 36 | 22 | 308.7 | 111.3 | 0.189  | 0.4631 | 0.4081 | 0.785  | 2.6167 | 0.4081 | -850.734 |
| 36 | 23 | 309.6 | 110.4 | 0.2141 | 0.6106 | 0.3507 | 0.9552 | 2.1846 | 0.3507 | -889.791 |
| 36 | 24 | 311.2 | 108.8 | 0.1924 | 0.5081 | 0.3786 | 0.8226 | 2.2252 | 0.3786 | -865.42  |
| 36 | 25 | 313.3 | 106.7 | 0.1694 | 0.6223 | 0.2722 | 0.8534 | 2.0222 | 0.2722 | -859.839 |
| 36 | 26 | 319.7 | 100.3 | 0.1711 | 0.7773 | 0.2201 | 0.9475 | 1.4615 | 0.2201 | -870.658 |
| 36 | 27 | 313.5 | 106.5 | 0.2128 | 0.5784 | 0.3679 | 0.9163 | 2.2609 | 0.3679 | -879.201 |
| 36 | 28 | 317.2 | 102.8 | 0.1914 | 0.6023 | 0.3178 | 0.8761 | 1.8146 | 0.3178 | -868.42  |
| 36 | 29 | 310   | 110   | 0.1762 | 0.609  | 0.2893 | 0.8687 | 2.2609 | 0.2893 | -865.628 |
| 36 | 30 | 312.9 | 107.1 | 0.1757 | 0.67   | 0.2622 | 0.9052 | 2.1123 | 0.2622 | -864.715 |
| 36 | 31 | 313.2 | 106.8 | 0.2553 | 0.5873 | 0.4347 | 1.0191 | 1.981  | 0.4347 | -904.812 |
| 36 | 32 | 317.7 | 102.3 | 0.1952 | 0.6805 | 0.2869 | 0.9403 | 1.8865 | 0.2869 | -878.767 |
| 36 | 33 | 311.8 | 108.2 | 0.1829 | 0.5735 | 0.319  | 0.8506 | 2.1191 | 0.319  | -867.664 |
| 36 | 34 | 310.1 | 109.9 | 0.2109 | 0.6185 | 0.3409 | 0.9526 | 2.2643 | 0.3409 | -886.438 |
| 36 | 35 | 312.1 | 107.9 | 0.1687 | 0.7165 | 0.2354 | 0.9284 | 2.3727 | 0.2354 | -858.317 |

#### Sequence ID Key

|    |               |
|----|---------------|
| 1  | Cres90_S1     |
| 2  | Ccan02_S3     |
| 3  | Ceug56_S4     |
| 4  | Ctsir35_S6    |
| 5  | Ctsir36_S7    |
| 6  | Cmil68_S8     |
| 7  | Ctsir39_S9    |
| 8  | Cmil62_S10    |
| 9  | Cper47_S11    |
| 10 | Cper52_S12    |
| 11 | Cbon82_S13    |
| 12 | Cper54_S15    |
| 13 | Cper59_S16    |
| 14 | Cmil64_S17    |
| 15 | Cmont76_S18   |
| 16 | Cmil61_S19    |
| 17 | Candr70_S21   |
| 18 | Cmont78_S24   |
| 19 | Cres94_S25    |
| 20 | Cper60_S26    |
| 21 | Cbon82_S27    |
| 22 | Cres92_S28    |
| 23 | Cres94_S29    |
| 24 | Cmil62_S32    |
| 25 | Cmil65_S33    |
| 26 | Cmont77_S34   |
| 27 | Candr71_S36   |
| 28 | Candr72_S37   |
| 29 | Cpseud121_S38 |
| 30 | Ctric84_S39   |
| 31 | Ccan118_S40   |
| 32 | Ccan118_S41   |
| 33 | Ccan119_S42   |
| 34 | Cbon80_S45    |
| 35 | Ctsir36_S49   |
| 36 | Cres91_S53    |
